1 **Accuracy of serological tests for diagnosis of chronic pulmonary aspergillosis: a systematic**  
2 **review and meta-analysis**

3  
4  
5 Cláudia Elizabeth Volpe Chaves<sup>a,c,¶\*</sup>, Sandra Maria do Valle Leone de Oliveira<sup>a,¶</sup>, James  
6 Venturini<sup>a</sup>, Antonio Jose Grande<sup>b</sup>, Tatiane Fernanda Sylvestre<sup>d</sup>, Rinaldo Poncio Mendes<sup>a,d</sup>,  
7 Anamaria Mello Miranda Paniago<sup>a</sup>

8  
9  
10 <sup>a</sup>Graduate Program in Infectious and Parasitic Diseases of Federal University of Mato Grosso do  
11 Sul, Campo Grande, Mato Grosso do Sul, Brazil;

12 <sup>b</sup>State University of Mato Grosso do Sul, Campo Grande, Mato Grosso do Sul, Brazil;

13 <sup>c</sup>Regional Hospital of Mato Grosso do Sul, Campo Grande, Mato Grosso do Sul, Brazil;

14 <sup>d</sup>Tropical Diseases Department, Faculdade de Medicina de Botucatu, Universidade Estadual  
15 Paulista (UNESP), Botucatu, São Paulo State, Brazil.

16  
17 \*Corresponding author.

18 E-mail:[claudiavolpe70@hotmail.com](mailto:claudiavolpe70@hotmail.com) (C.E. Volpe-Chaves)

19  
20 <sup>¶</sup>These authors contributed equally to this work.

## 21 **Abstract**

22 Chronic pulmonary aspergillosis (CPA) is a disease that benefits from cavities as after-effects of  
23 tuberculosis, presenting a high mortality rate. Serological tests like double agar gel  
24 immunodiffusion test (DID) or the counterimmunoelectrophoresis (CIE) test have been routinely  
25 used for CPA diagnosis in the absence of positive cultures; however, they have been replaced by  
26 enzyme-linked immunoassay (ELISA), with a variety of methods.

27 This systematic review aims to compare the accuracy of the ELISA test with the reference test  
28 (DID and/or CIE) in CPA diagnosis. It was conducted according to the Preferred Reporting Items  
29 for Systematic Reviews and Meta-Analyzes (PRISMA).

30 The study was registered in PROSPERO under the registration number CRD42016046057. We  
31 searched the electronic databases MEDLINE (PubMed), EMBASE (Elsevier), LILACS (VHL),  
32 Cochrane library, and ISI Web of Science. Gray literature was researched in Google Scholars and  
33 conference abstracts. We included articles with patients or serum samples from CPA patients who  
34 underwent two serological tests: ELISA (index test) and IDD and/or CIE (reference test), using  
35 the accuracy of the tests as a result. Original articles were considered without a restriction of date  
36 or language. The pooled sensitivity, specificity, and summary receiver operating characteristic  
37 curves were estimated.

38 We included 13 studies in the review, but only four studies were included in the meta-analysis.  
39 The pooled sensitivities and specificities were 0.93 and 0.97 for the ELISA test. For the reference  
40 test (DID and/or CIE), these values were 0.64 and 0.99. Analyses of summary receiver operating  
41 characteristic curves yielded 0.99 for ELISA and 0.99 for the reference test (DID and/or CIE). Our

42 meta-analysis suggests that the diagnostic accuracy of ELISA is greater than that of the reference  
43 tests (DID and/or CIE) in early detection of CPA .

44

## 45 **Introduction**

46           Chronic pulmonary aspergillosis (CPA) is a slow and progressive lung disease caused by  
47 *Aspergillus spp.* that develops in preexisting cavities of patients with chronic respiratory diseases,  
48 and pulmonary tuberculosis is its main predisposing factor, with a global prevalence estimated at  
49 1.2 million cases [1]. Its prognosis is poor, with 38-85% mortality in five years [1,2].

50           CPA presents five clinical forms: 1. aspergillus nodule, 2. pulmonary simple aspergilloma,  
51 3. chronic cavitary pulmonary aspergillosis (CCPA), also called complex aspergilloma, 4. chronic  
52 fibrosing pulmonary aspergillosis (CFPA), and 5. subacute invasive pulmonary aspergillosis  
53 (SAIA) [3]. Aspergilloma is present in only one-third of patients with CPA [1,4].

54           The diagnosis of CPA is based on suggestive images, preferably tomographic images (CT  
55 scan), on evidence of microbiological infection by *Aspergillus* or on the presence of an immune  
56 response to this agent, maintained for at least 3 months [3,5].

57           Serologic tests are indispensable for the diagnosis in the absence of positive cultures and  
58 are considered the best noninvasive tests to diagnose this entity [6,7]. These tests may be over 90%  
59 positive with precipitins or in the detection of *Aspergillus* IgG [2,3].

60           In patients presenting *Aspergillus* in the respiratory tree, the detection of specific serum  
61 antibodies differentiates infection from colonization, with a positive predictive value of 100% for  
62 identification of infection [8]. Initially, antibodies against *Aspergillus fumigatus* were determined  
63 by detection of precipitins using the double agar gel immunodiffusion test (DID) or the  
64 counterimmunoelectrophoresis technique (CIE) [4,9,10] with a sensitivity of 89.3% [6] and a  
65 specificity of 100% [11].

66           These methods (DID and CIE) consume a lot of time, intense work, require relatively large  
67 extracts of *A. fumigatus* and patient serum, and provide only semiquantitative results [7].

68           The *Aspergillus* IgG antibody test is strongly recommended by the Infectious Diseases  
69 Society of America IDSA [12]. In practice, precipitation techniques have already been replaced  
70 by the *Aspergillus* IgG antibody detection test by enzyme-linked immunoassay (ELISA) [13]. This  
71 is considered the fastest and most sensitive test [14], producing quantitative results with lower  
72 extracts of *A. fumigatus* and patient serum by test, besides it is easily automated [7].

73           Despite its importance, serology for the detection of *Aspergillus* IgG by ELISA still does  
74 not reach a definitive conclusion on diagnostic performance for CPA, as significant differences in  
75 sensitivity, specificity and coefficient of variation need to be explored with cohorts of well-  
76 characterized patients [3].

77           Historically, IgG ELISA assays used in-house antigens, with different antigenic  
78 preparations and concentrations, which makes the comparison of test performance very difficult  
79 [7]. Currently, we have commercial tests such as ELISA plates for *Aspergillus*-specific IgG  
80 antibodies produced by Serion (Germany), IBL (Germany / USA), Dynamiker / Bio-Enoche  
81 (China), Bio-Rad (France), Bordier (Switzerland) and Omega / Genesis (UK), as well as specific  
82 *Aspergillus* IgG automated systems such as Immunolite-Siemens (Germany) and ImmunoCAP  
83 (Thermo Fisher Scientific / Phadia), which are fluoroenzyme immunoassay variants of ELISA.  
84 The main limitation of these tests is the detection of antibodies only against *A. fumigatus* and as  
85 they account for only 40% of the isolates, diagnosis of CPA caused by non-*fumigatus* strains is  
86 still a challenge [2].

87           Considering the variety of methods for detection of antibodies to *Aspergillus*, the use of  
88 precipitation tests due to their low cost and the absence of more precise options for serological  
89 diagnosis of CPA, the present study review on serological diagnosis of chronic pulmonary

90 aspergillosis, comparing the performance of the precipitation tests with the enzyme-linked  
91 immunoassay tests.

92

## 93 **Materials and Methods**

94 We conducted a systematic review of the literature in accordance with the  
95 recommendations of the Preferred Reporting Items for Systematic Reviews and Meta-Analyses  
96 (PRISMA) [15] and STARD 2015 [16]. A protocol for systematic review was developed and  
97 registered in the International Prospective Register of Systematic Reviews - CRD42016046057.  
98 We used the Cochrane recommendations to report systematic reviews and meta-analyses of studies  
99 on diagnostic accuracy [17].

100

### 101 **Eligibility criteria**

102 We considered as inclusion criteria articles with population or serum samples from patients  
103 diagnosed with aspergilloma or chronic pulmonary aspergillosis that were submitted to the ELISA  
104 immunoenzymatic test (ELISA test) and to the double immunodiffusion gel agar and/or  
105 counterimmunoelectrophoresis test (DID and/or CIE). The accuracy of the tests was defined as  
106 primary outcome. Original studies were included without restriction of language, geographical  
107 location or date of publication. We excluded studies with children or animals and/or *in vitro*. We  
108 were unable to find an article in Japanese, which was selected for full article reading because it  
109 was not available in the international library commuting service.

110

111

## 112 **Information sources and search strategies**

113 The studies were searched in the following databases: MEDLINE (through PubMed),  
114 EMBASE (through Elsevier), LILACS (through VHL), Cochrane library and ISI Web of Science.  
115 Gray literature was researched in Google Scholars and congress abstracts. We submitted the search  
116 strategy performed until June 2019.

117 We used the following search strategy for Medline and adapted it for the other databases:  
118 pulmonary aspergillosis AND serologic test (and its synonyms). 1. ("Pulmonary Aspergillosis"  
119 [Mesh] or Aspergillosis, Pulmonary or Pulmonary Aspergillosis or Lung Aspergillosis or  
120 Aspergillosis, Lung or Aspergillosis, Lung or Bronchopulmonary Aspergillosis or Aspergillosis,  
121 Bronchopulmonary or Bronchopulmonary Aspergillosis or Aspergillosis, Bronchopulmonary or  
122 Aspergillose, Bronchopulmonary or Bronchopulmonary Aspergillose) AND ("Serologic Tests"  
123 [Mesh] or Serological Tests or Serological Tests or Serological Tests, Serological or Tests,  
124 Serologic or Serologic Tests or Serologic Tests or Serodiagnoses).

125

## 126 **Study selection and data extraction**

127 Titles were imported from EndNote Online and duplicate studies were removed. The  
128 remaining titles were independently reviewed by two authors (TFS and SMVLO), who selected  
129 the article abstracts, as well as defined the complete texts for evaluation. The divergences were  
130 resolved by a third expert reviewer (RPM). Two other authors (CEVC and JV) performed  
131 independent evaluations of the complete articles and judged the methodological quality of the  
132 included studies using the Quality Assessment of Diagnostic Accuracy Studies (QUADAS-2) tool  
133 [18]. The divergences were resolved by consensus among the researchers.

134 Two reviewers (CEVC, JV) independently extracted the following data from each included  
135 study:

- 136 - Study characteristics: author, year of publication, country, design, and sample size.
- 137 - Population characteristics: according to the inclusion criteria
- 138 - Description of the index test and cut-off points;
- 139 - Description of the reference standard and cut-off points;
- 140 - QUADAS-2 items;
- 141 - Accuracy results obtained in each study to construct a diagnostic contingency (two-by-two table);

142

## 143 **Assessment of methodological quality**

144 For this review, we used the QUADAS-2 tool to assess the methodological quality of  
145 studies [18]. QUADAS-2 consists of four key domains: patient selection, index test, reference  
146 standard, and flow and timing. We assessed all domains for the potential of risk of bias (ROB) and  
147 the first three domains for concerns regarding applicability. Risk of bias is judged as “low”, “high”,  
148 or “unclear”. Two review authors independently completed QUADAS-2 and resolved  
149 disagreements through discussion.

150

## 151 **Statistical analysis and data synthesis**

152 We used data reported in the true positive (TP), false positive (FP), true negative (TN) and  
153 false negative (FN) format to calculate sensitivity and specificity estimates and 95% confidence  
154 intervals (CIs) for individual studies. Summary positive (LR+) and negative (LR-) likelihood ratios  
155 and summary diagnostic odds ratio (DOR) were obtained from the bivariate analysis. We used the



156 clinical interpretation of likelihood ratios [19] as follows: conclusive evidence (LR+>10 and LR-  
157 <0.1), strong diagnostic evidence (LR+ >5 to 10 and LR- 0.1 to <0.2), weak diagnostic evidence  
158 (LR+ >2 to 5 and LR- 0.2 to <0.5) and negligible evidence (LR+ 1 to 2 and LR- 0.5 to 1).

159 In studies where it was possible to calculate sensitivity and specificity for the ELISA test  
160 and DID and/or CIE, we calculated accuracy test and Youden's J statistic. The Youden's index  
161 values range from zero to one inclusive, with the expectancy that the test will show a greater  
162 proportion of positive results for the diseased group than for the control [20].

163 Studies were submitted to meta-analysis when three conditions were required: 1. sample  
164 size greater than 20; 2. sensitivity and specificity were available for the index and the reference  
165 tests; 3. healthy controls were included in the analysis. We presented individual studies and pooled  
166 results graphically by plotting the estimates of sensitivity and specificity (and their 95% CIs),  
167 heterogeneity and receiver operating characteristic (ROC) space using Stata software. For the  
168 subgroup analysis we presented individual studies and pooled results in forest plots using Meta-  
169 DiSc software.

170

## 171 **Investigations of heterogeneity**

172 We investigated heterogeneity by subgroup analyses. We addressed the main source of  
173 heterogeneity: in-house and commercial ELISA tests. In-house tests have presented many  
174 technical differences. We considered an I<sup>2</sup> value close to 0% as having no heterogeneity between  
175 studies, close to 25% with low heterogeneity, close to 50% with moderate heterogeneity and close  
176 to 75% with high heterogeneity between studies [21].

177

## 178 **Results**

### 179 **Study inclusion**

180           A total of 2096 articles were identified in five databases, of which 2010 were searched  
181 through a database and 63 articles were identified from other sources (manual search). After the  
182 removal of duplicates, we remain with 1797 articles. After title / abstract exclusion, only 20 articles  
183 were submitted to a full text read and 13 of them were included for the systematic review; only  
184 four studies were included for the meta-analysis (see Fig 1).

185

186

## Fig1. Study flow diagram

187

188

189

## 190 **Characteristics of the studies**

191

192

193

194

195

The characteristics of the included studies are presented in S1Table. The earliest study was published in 1983 [22] and the five most current articles were published in 2015 [23], 2016 [24, 25, 26] and 2018 [27]. Nine studies took place in five countries: Japan [25, 28], Brazil [23], United Kingdom [24, 29], France [26, 30, 31] and India [27], but in 4 articles, the study countries were not reported [22, 32, 33, 34].

196

197

198

Nine articles presented DID as the reference test [22, 23, 25, 27, 28, 30, 32, 33, 34]; an article presented two reference tests, DID and CIE [34] and four studies presented only CIE as the reference test [24, 26, 29, 31].

199

200

201

202

203

204

When we performed data extraction, some important differences were observed and deserve to be highlighted. Seven articles performed in-house ELISA tests [22, 23, 28, 30, 32, 33, 34] and six articles described their studies with commercial tests [24, 25, 26, 27, 29, 31]. Different *Aspergillus* antigens and cut-off points were used in the in-house ELISA tests; the articles that used commercial tests also used several types of antigens and cutoff points included by authors beyond those established by the manufacturer and are described in S1 Table.

205

206

207

208

In one article, we were unable to identify the number of patients evaluated with CPA, nor was it possible to extract data from the 2×2 table for DID and ELISA [28]; in two articles it was not possible to recover the DID data [25, 30]; in another article, data were not obtained from CIE [31] and in another [32], it was not possible to extract data for ELISA. In one study [33], 20 sera

209 from 13 patients were used and it was not possible to extract the accurate data per patient, besides  
210 data from the control group was not presented for the ELISA test; in two articles, the tests were  
211 not submitted to a control group [26, 29]; furthermore, in one article, the control group was  
212 performed on patients with any presence of DID precipitation line and it was not considered by us  
213 as a control group [25].

214 During the extraction of ELISA antigen concentration data, five studies with in-house tests  
215 presented concentrations varying from 0.1 mcg to 250 mcg per well [22, 23, 30, 33, 34]; in two  
216 articles these concentrations were not reported [28, 32].

217 In the in-house tests, we still find other differences, such as ELISA secondary antibody  
218 dilution, with concentrations ranging from 1: 100 to 1: 300 when they were described [22, 23, 33,  
219 34]; in three articles these dilutions were not reported [28, 30, 32]. When we evaluated the cut-off  
220 for ELISA, several descriptions were found with titers ranging from 1: 100 to 1: 800; we also  
221 found values in OD (optic density), au / mL, in percentage and in absorbance, and there was no  
222 comparable value in in-house tests [22, 23, 33, 34]; in three articles, the cut-off was not described  
223 [28, 30, 32]. For the ELISA substrate, TMB (3,3',5,5'-Tetramethylbenzidine) was found in two  
224 articles [22, 23], also pNPP (Alkaline Phosphatase Yellow) [33, 34] and OPD (o-  
225 Phenylenediamine) [30]; in two articles the substrate was not reported [28, 32].

226 When extracting antigen concentration data from *Aspergillus fumigatus* in the studies for  
227 DID or CIE, we found variations between 5mg / mL and 100mg / mL [22, 29, 32, 33, 34]; we found  
228 values expressed in microliters in the following studies: 2  $\mu$ L [31], 10  $\mu$ L [26] and 20  $\mu$ L [24]; and  
229 in one article different concentrations were used for somatic antigen [20 mg / mL] and antigen  
230 filtration [2mg / mL] [29]. The DID concentrations were not described in three articles [23, 28,  
231 30].

232 The studies with commercial ELISA tests used the following tests: ImmunoCap [29, 24,  
233 27, 25], Platelia [29], Immulite [24], Serion [24, 31], Dynamiker [24], Genesis [24], Bio-Rad [31,  
234 26], and Bordier [26]. These tests presented different cut-off points and the one with the best  
235 performance is described in S1 Table.

236 All methodological differences can be observed in S1 table.

237

## 238 **Risk assessment of bias**

239 We illustrated the methodological quality of the included 13 studies using the QUADAS-  
240 2 tool (Figs 2 and 3). All studies had unclear or high risk of bias in at least one domain. Almost all  
241 studies [22, 23, 24, 25, 27, 28, 29, 30, 31, 32, 33, 34] demonstrated high-risk patient selection bias,  
242 except one that was unclear (26), resulting mainly from not using consecutive or randomized  
243 patient samples and not avoiding a case-control study. In seven studies [22, 28, 30, 31, 32, 33, 34],  
244 there is not a clear definition of exclusion criteria.

245

246 **Fig 2. Proportion graph of studies assessed as having low, high or unclear risk of bias**  
247 **and/or applicability concerns**

248

249

250

251 **Fig 3. Risk of bias and applicability concerns graph: review of the authors' judgments**  
252 **about each domain presented as percentages across included studies**

253

254

255

256

257           In the index test, eleven studies [22, 23, 24, 25, 26, 28, 30, 31, 32, 33, 34] presented an  
258   unclear or high risk of bias; mainly because the index test was interpreted with prior knowledge  
259   of the standard test. Eleven studies had a low risk of bias in the previous cut-off determination [22,  
260   23, 24, 25, 26, 27, 28, 29, 31, 33, 34].

261           In the reference test, all studies had a low risk of correctly classifying the target condition;  
262   bias risk assessment was uncertain or high risk in 9 studies [22, 24, 25, 26, 28, 30, 31, 33, 34] for  
263   not making it clear whether the standard test was interpreted without the knowledge of the index  
264   test or if they already had prior knowledge.

265           Regarding flow and time, bias risk assessment was uncertain in eight studies [22, 26, 28,  
266   29, 30, 31, 33, 34] for not clearly describing whether there was an appropriate interval between  
267   conducting the index test and the reference test; in one study [25] the evaluation was high risk. In  
268   eleven studies, all patients were submitted to a reference test, it was included in the analysis [22,  
269   23, 24, 25, 27, 29, 30, 31, 32, 33, 34] and they had low risk; in one study, not all patients were  
270   submitted to a test reference [26] and in one study [28] this was uncertain.

271           Regarding applicability, almost all the articles presented low concern, because they did not  
272   fail to correspond to the critical question of this study.

273

274

275

276

277

278

279

## 280 Diagnostic accuracy

281 We present the Table 1 with all the articles included in this systematic review, with a  
 282 description of the index and reference tests, a number of patients and healthy controls, and a  
 283 presentation of the values of sensibility, specificity, accuracy test, likelihood positive value,  
 284 likelihood negative value and Youden's statistic.

**Table 1. Performance of ELISA test and reference tests in studies included in systematic review**

| Ref.                   | Assay                       | CPA                  | Healthy controls | Sensitivity (%)    | Specificity (%)       | Accuracy            | LR+    | LR-   | Youden's J statistic   |
|------------------------|-----------------------------|----------------------|------------------|--------------------|-----------------------|---------------------|--------|-------|------------------------|
| Azevedo et al., 2015   | ELISA in-house <sup>a</sup> | 22                   | 200              | 81.8               | 94                    | 93                  | 13.64  | 0.193 | 0.76                   |
|                        | ELISA In-house <sup>b</sup> | 22                   | 200              | 72.7               | 97                    | 95                  | 29.09  | 0.280 | 0.7                    |
|                        | ELISA in-house <sup>c</sup> | 22                   | 200              | 86.4               | 96.5                  | 96                  | 24.68  | 0.141 | 0.83                   |
|                        | ELISA In-house <sup>d</sup> | 22                   | 200              | 59.1               | 99.5                  | 96                  | 118.18 | 0.411 | 0.59                   |
|                        | DID 1 <sup>e</sup>          | 22                   | 200              | 45.5               | 100                   | 95                  | 183.52 | 0.545 | 0.46                   |
| Baxter et al., 2012    | DID 2 <sup>f</sup>          | 22                   | 200              | 59.1               | 100                   | 96                  | 235.96 | 0.414 | 0.59                   |
|                        | ELISA ImmunoCAP             | 116                  | -                | 86                 | -                     | -                   | -      | -     | -                      |
|                        | ELISA Platellia             | 116                  | -                | 85                 | -                     | -                   | -      | -     | -                      |
| Dumollard et al., 2016 | CIE                         | 116                  | 0                | 56                 | -                     | -                   | -      | -     | -                      |
|                        | ELISA Bordier               | 129                  | 0                | 98                 | -                     | -                   | -      | -     | -                      |
|                        | ELISA Bio-Rad               | 129                  | 0                | 95                 | -                     | -                   | -      | -     | -                      |
| Faux et al., 1992      | CIE                         | 129                  | 0                | 87                 | -                     | -                   | -      | -     | -                      |
|                        | ELISA In-house              | 11                   | 18               | -                  | -                     | -                   | -      | -     | -                      |
| Fujiuchi et al., 2016  | DID                         | 11                   | 18               | 100                | 100                   | 100                 | 36.42  | 0.04  | 1                      |
|                        | ELISA ImmunoCAP             | 96 <sup>g</sup>      | -                | 98                 | -                     | -                   | -      | -     | -                      |
|                        | ELISA ImmunoCAP             | 51 <sup>h</sup>      | -                | 39                 | -                     | -                   | -      | -     | -                      |
| Guitard et al., 2012   | DID                         | 147                  | -                | -                  | -                     | -                   | -      | -     | -                      |
|                        | ELISA Serion                | 51                   | 222              | 92/88 <sup>i</sup> | 95.9/91 <sup>i</sup>  | 95/90 <sup>i</sup>  | -      | -     | 0.88/0.79 <sup>i</sup> |
|                        | ELISA Bio-Rad               | 51                   | 222              | 94/90 <sup>a</sup> | 100/99.5 <sup>t</sup> | 100/99 <sup>t</sup> | -      | -     | 0.94/0.9 <sup>t</sup>  |
| Kauffman et al., 1983  | CIE                         | 51                   | 222              | -                  | -                     | -                   | -      | -     | -                      |
|                        | ELISA In-house              | 20 (13) <sup>j</sup> | 50               | -                  | -                     | -                   | -      | -     | -                      |

|                              |                                   |                            |            |             |             |             |               |             |             |
|------------------------------|-----------------------------------|----------------------------|------------|-------------|-------------|-------------|---------------|-------------|-------------|
|                              | <b>DID</b>                        | <b>20 (13)<sup>i</sup></b> | <b>50</b>  | <b>-</b>    | <b>-</b>    | <b>-</b>    | <b>-</b>      | <b>-</b>    | <b>-</b>    |
| <b>Kurup et al., 1984</b>    | <b>ELISA in-house<sup>j</sup></b> | <b>24</b>                  | <b>12</b>  | <b>83.3</b> | <b>100</b>  | <b>88.9</b> | <b>21.32</b>  | <b>0.19</b> | <b>0.83</b> |
|                              | <b>ELISA in-house<sup>k</sup></b> | <b>24</b>                  | <b>12</b>  | <b>50</b>   | <b>100</b>  | <b>66.7</b> | <b>13.00</b>  | <b>0.52</b> | <b>0.5</b>  |
|                              | <b>ELISA in-house<sup>l</sup></b> | <b>24</b>                  | <b>12</b>  | <b>79.2</b> | <b>100</b>  | <b>86.1</b> | <b>20.28</b>  | <b>0.23</b> | <b>0.79</b> |
|                              | <b>DID 507<sup>j</sup></b>        | <b>24</b>                  | <b>12</b>  | <b>95.8</b> | <b>91.7</b> | <b>94.4</b> | <b>11.50</b>  | <b>0.05</b> | <b>0.88</b> |
|                              | <b>DID 534<sup>k</sup></b>        | <b>24</b>                  | <b>12</b>  | <b>100</b>  | <b>83.3</b> | <b>94.4</b> | <b>5.10</b>   | <b>0.03</b> | <b>0.83</b> |
|                              | <b>DID 515<sup>l</sup></b>        | <b>24</b>                  | <b>12</b>  | <b>96</b>   | <b>100</b>  | <b>97.2</b> | <b>24.44</b>  | <b>0.06</b> | <b>0.96</b> |
| <b>Mishra et al., 1983</b>   | <b>ELISA In-house</b>             | <b>17</b>                  | <b>50</b>  | <b>100</b>  | <b>98</b>   | <b>98.5</b> | <b>33.06</b>  | <b>0.03</b> | <b>0.98</b> |
|                              | <b>DID</b>                        | <b>17</b>                  | <b>50</b>  | <b>100</b>  | <b>100</b>  | <b>100</b>  | <b>99.17</b>  | <b>0.03</b> | <b>1</b>    |
| <b>Page et al., 2016</b>     | <b>CIE ELISA</b>                  | <b>17</b>                  | <b>50</b>  | <b>100</b>  | <b>100</b>  | <b>100</b>  | <b>99.17</b>  | <b>0.03</b> | <b>1</b>    |
|                              | <b>ImmunoCAP ELISA</b>            | <b>341</b>                 | <b>100</b> | <b>96</b>   | <b>98</b>   | <b>96</b>   | <b>47.95</b>  | <b>0.04</b> | <b>0.94</b> |
|                              | <b>Immulite ELISA</b>             | <b>341</b>                 | <b>100</b> | <b>96</b>   | <b>98</b>   | <b>96</b>   | <b>47.95</b>  | <b>0.04</b> | <b>0.94</b> |
|                              | <b>Serion ELISA</b>               | <b>341</b>                 | <b>100</b> | <b>90</b>   | <b>98</b>   | <b>92</b>   | <b>44.87</b>  | <b>0.11</b> | <b>0.88</b> |
|                              | <b>Dynamiker ELISA</b>            | <b>341</b>                 | <b>100</b> | <b>77</b>   | <b>97</b>   | <b>82</b>   | <b>25.71</b>  | <b>0.24</b> | <b>0.74</b> |
|                              | <b>Genesis ELISA</b>              | <b>341</b>                 | <b>100</b> | <b>75</b>   | <b>99</b>   | <b>80</b>   | <b>75.07</b>  | <b>0.25</b> | <b>0.74</b> |
|                              | <b>CIE ELISA</b>                  | <b>341</b>                 | <b>100</b> | <b>59</b>   | <b>100</b>  | <b>68</b>   | <b>119.01</b> | <b>0.41</b> | <b>0.59</b> |
| <b>Sarfati et al., 2006</b>  | <b>In-house<sup>m</sup> ELISA</b> | <b>51</b>                  | <b>41</b>  | <b>81</b>   | <b>98</b>   | <b>88</b>   | <b>33.09</b>  | <b>0.20</b> | <b>0.79</b> |
|                              | <b>In-house<sup>n</sup> ELISA</b> | <b>51</b>                  | <b>41</b>  | <b>79</b>   | <b>98</b>   | <b>87</b>   | <b>32.37</b>  | <b>0.22</b> | <b>0.77</b> |
|                              | <b>In-house<sup>o</sup> ELISA</b> | <b>51</b>                  | <b>41</b>  | <b>77</b>   | <b>98</b>   | <b>86</b>   | <b>31.65</b>  | <b>0.23</b> | <b>0.75</b> |
|                              | <b>In-house<sup>p</sup> ELISA</b> | <b>51</b>                  | <b>41</b>  | <b>93</b>   | <b>95</b>   | <b>94</b>   | <b>19.06</b>  | <b>0.07</b> | <b>0.88</b> |
|                              | <b>In-house<sup>q</sup> ELISA</b> | <b>51</b>                  | <b>41</b>  | <b>93</b>   | <b>95</b>   | <b>94</b>   | <b>19.06</b>  | <b>0.07</b> | <b>0.88</b> |
|                              | <b>in-house<sup>r</sup> ELISA</b> | <b>51</b>                  | <b>41</b>  | <b>91</b>   | <b>95</b>   | <b>93</b>   | <b>18.70</b>  | <b>0.09</b> | <b>0.86</b> |
|                              | <b>in-house<sup>s</sup> ELISA</b> | <b>51</b>                  | <b>41</b>  | <b>95</b>   | <b>93</b>   | <b>94</b>   | <b>12.95</b>  | <b>0.06</b> | <b>0.88</b> |
|                              | <b>DID ELISA</b>                  | <b>51</b>                  | <b>41</b>  | <b>-</b>    | <b>-</b>    | <b>-</b>    | <b>-</b>      | <b>-</b>    | <b>-</b>    |
|                              | <b>ImmunoCAP ELISA</b>            | <b>137</b>                 | <b>50</b>  | <b>94</b>   | <b>100</b>  | <b>96</b>   | <b>95.72</b>  | <b>0.06</b> | <b>0.96</b> |
|                              | <b>DID ELISA</b>                  | <b>137</b>                 | <b>50</b>  | <b>26</b>   | <b>100</b>  | <b>46</b>   | <b>26.24</b>  | <b>0.75</b> | <b>0.26</b> |
| <b>Yamamoto et al., 1988</b> | <b>ELISA in-house</b>             | <b>-</b>                   | <b>45</b>  | <b>-</b>    | <b>-</b>    | <b>-</b>    | <b>-</b>      | <b>-</b>    | <b>-</b>    |
|                              | <b>DID</b>                        | <b>-</b>                   | <b>-</b>   | <b>-</b>    | <b>-</b>    | <b>-</b>    | <b>-</b>      | <b>-</b>    | <b>-</b>    |

285 AF (*A.fumigatus*) strain and 0.12 cut-off; b. AF, *A.niger* and *A.flavus* pool and 0.13 cut-off; c. AF strain and 0.09 cut-off; d. AF, *A.niger* and *A.flavus*  
286 pool and 0.1 cut-off; e. AF strain; f. AF, *A.niger* and *A.flavus* pool; g. proven cases; h. possible case; i. 20 patients (13 sera); j. AF 507 strain; k. AF  
287 537 strain; l. AF 515 strain; m. RNU; n. DPPV; o. CAT; p. CAT + RNU; q. CAT+ DPPV; r. RNU + DPPV; s. RNU + DPPV + CAT; t. first and  
288 second percentages were obtained then equivocal results were considered as positives or negatives, respectively.

289



290 The Youden index ranged from 0.50 to 0.98 for the ELISA test and from 0.26 to 1 for the  
291 reference test (DID and/or CIE) for the individual studies. Three studies presented a good  
292 performance above 0.90 Youden index for the reference test [22, 32, 34]. The other studies  
293 presented a performance below 0.90. The Youden indicates the trade-off between sensitivity and  
294 specificity.

295

296

## 297 **Quantitative synthesis - meta-analysis**

298 In individual studies included in the meta-analysis, ELISA test sensitivity ranged from 0.83  
299 (95% CI 0.63 to 0.95) [22] to 0.96 (95% CI 0.93 to 0.98) [24] and specificity ranged from 0.92  
300 (95% CI 0.64 to 1.00) [22] to 0.98 (95% CI 0.93 to 1.00) [24]. The pooled sensitivity and  
301 specificity for the ELISA test, based on four data studies [22, 23, 24, 27], were 0.93 (95% CI 0.87  
302 to 0.96) and 0.97 (95% CI 0.94 to 0.98), respectively. Pooled LR+ and LR- were 31.40 (95% CI  
303 16.40 to 60.10) and 0.07 (95% CI 0.04 to 0.14), respectively. Pooled DOR were 440.00 (95% CI  
304 156.00 to 1241.00). We interpreted the pooled LR+/LR- from the ELISA test as conclusive  
305 evidence, but we have not interpreted the reference test (DID and/or CIE) in the same way, because  
306 LR- was included as weak diagnostic evidence.

307 In the DID and/or CIE tests analyses, the sensitivity and specificity in individual studies  
308 ranged from 0.26 (95% CI 0.18 to 0.34) [27] to 0.96 (95% CI 0.79 to 1.00) [22] and 0.92 (95% CI  
309 0.64 to 1.00) [22] to 1.00 (95% CI 0.97 to 1.00) [23], respectively. The pooled sensitivity and  
310 specificity for DID and/or CIE tests were 0.64 (95% CI 0.29 to 0.89) and 0.99 (95% CI 0.96 to  
311 1.00). Pooled LR+/LR- were 53.00 (95% CI 19.20 to 146.40) and 0.36 (95% CI 0.14 to 0.92).  
312 Pooled DOR were 146.00 (95% CI 40.00 to 532.00).

313           The forest plots in Figs 4 and 5 show the sensitivity, specificity ranges and heterogeneity  
314 for the ELISA test and reference test (DID and/or CIE) in detecting chronic pulmonary  
315 aspergillosis across the included studies.

316           **Fig 4. Forest plot for sensitivity, specificity and heterogeneity from four ELISA studies.**

317  
318  
319  
320  
321  
322  
323  
324  
325  
326  
327  
328  
329

**Fig 5. Forest plot for sensitivity, specificity and heterogeneity from four DID and/or CIE studies.**

330  
331

332           We also constructed the sROC curves and calculated the area under ROC (AUROC) for  
333 included studies (Fig 6). The overall diagnostic performance of the ELISA and the reference test  
334 (DID and/or CIE) were comparable (AUROC 0.99 [95% CI 0.97 to 0.99], and 0.99 [95% CI 0.97  
335 to 0.99], respectively).

336  
337  
338  
339  
340  
341  
342  
343

**Fig 6. Summary ROC curves from the four included studies. A. AUROC for the ELISA test; B. AUROC for the reference test (DID and/or CIE).**

344

## 345 **Investigations of heterogeneity**

346           When we evaluated the four studies [22, 23, 24, 27], we found a heterogeneity (I<sup>2</sup>) of 67.69  
347 (95% CI 33.17 to 100.00) in the ELISA sensitivity pool, considered as moderate heterogeneity,  
348 and 96.50 (95% CI 94.38 to 98.62) in the DID and/or CIE sensitivity pool, considered to be highly  
349 heterogeneous. We investigated the subgroup analyses, evaluating only the two most recent studies  
350 using commercial ELISA tests [24, 27] and the heterogeneity (I<sup>2</sup>) was 0% for sensitivity and  
351 specificity. When we studied the reference tests, the heterogeneity (I<sup>2</sup>) was 97.8% for sensibility  
352 and 0% for specificity.

353           The pooled sensitivity and specificity for the ELISA test, based on two data studies [24,  
354 27], were 0.95 (95% CI 0.93 to 0.97) and 0.98 (95% CI 0.95 to 1.00), respectively. Pooled LR+  
355 and LR- were 54.92 (95% CI 16.08 to 187.64) and 0.05 (95% CI 0.03 to 0.07), respectively. Pooled  
356 DOR were 1231.40 (95% CI 326.00 to 4651.70). The pooled sensitivity and specificity for the  
357 reference test (DID and/or CIE), based on two data studies [24, 27], were 0.49 (95% CI 0.45 to  
358 0.54) and 0.99 (95% CI 0.96 to 1.00), respectively. Pooled LR+ and LR- were 55.39 (95% CI 7.82  
359 to 392.60) and 0.56 (95% CI 0.29 to 1.06), respectively. Pooled DOR were 100.07 (95% CI 11.84  
360 to 845.84). These results are presented in Figs 7 and 8.

361

362 **Fig 7. Forest plot of sensitivity (A), specificity(B) and heterogeneity from the ELISA test for**  
363 **the subgroup analyses (two studies).**

364

365

366 **Fig 8. Forest plot of sensitivity (A), specificity (B) and heterogeneity from the DID and/or**  
367 **CIE test for the subgroup analyses (two studies).**

368

369

370           Studies using in-house ELISA tests show large methodological differences in their  
371 performance. In the DID and/or CIE tests, high heterogeneity was maintained for the sensitivity in  
372 both studies [24, 27], considering that the precipitation tests are all in-house and also present large  
373 methodological differences in the studies included in this review.

374

375

## 376 **Discussion**

377           This is the first systematic review comparing the ELISA test with the precipitin tests (DID  
378 and/or CIE) for the diagnosis of chronic pulmonary aspergillosis. Although current studies suggest  
379 ELISA as a better performance test for CPA diagnosis, precipitation tests are still considered in  
380 many countries as the reference test, especially in Brazil, where this review was carried out.

381           Thirteen articles that met the criteria for the research question were included, and all studies  
382 were considered as having an uncertain or high risk of bias in some domains in the quality risk  
383 assessment.

384           Important methodological differences were verified, mainly related to the in-house ELISA  
385 tests. More recent studies with commercial ELISA tests were included in the review, but also with  
386 differences described. We also observed this phenomenon in the DID and/or CIE tests, as these  
387 are all still in-house.

388           Mainly in former studies, we observed that the population selection was based on stored  
389 samples from patients already diagnosed with CPA and submitted to the tests described in the  
390 review. In addition, the lack of a checklist in the studies' description was very evident, where many

391 items in QUADAS-2 were not reported clearly, interfering with the quality of the evaluation. As  
392 an example, we noted that, in one study, although we were skilled in extracting the data for  
393 constructing the 2 x 2 table, the discussion and conclusion of the study had an error in printing and  
394 they were not compatible with the objective, methods and results of the article [22].

395 In the ELISA evaluation in individual studies included in the meta-analysis, the best  
396 performances based on the Youden's test were from the commercial tests [24, 27], with  
397 ImmunoCAP and Immulite tests, ranging from 0.94 to 0.96.

398 When we evaluated Youden's J statistic for the precipitation test (DID or CIE), in the  
399 studies included in the meta-analysis, only one study presented a performance of 0.96 [22] and the  
400 other studies [23, 24, 27] ranged between 0.26 and 0.59.

401 In a review article [35] it was reported that precipitin tests do not detect all CPA cases, but  
402 are correlated with disease activity and may become negative, so they can function as a follow-up  
403 tool along with imaging and inflammatory markers.

404 The ELISA test seems to be a promising test, and even with important methodological  
405 differences, it was useful to evaluate the use of diagnostic data for chronic lung aspergillosis in  
406 each study where it was possible to obtain data for the calculation of sensitivity and specificity.  
407 Two more recent studies were highlighted in this review [24, 27], with sensitivities presenting  
408 lower confidence intervals for the ELISA test, and when compared to the confidence intervals  
409 from the reference tests (DID and/or CIE), they showed a better performance. Besides that, the  
410 pooled LR+/LR- from the ELISA test presented as conclusive evidence and this was not observed  
411 in the reference test results.

412 Several studies have recently been published with serological data using only commercial  
413 ELISA tests for CPA diagnosis in an area with a high prevalence of tuberculosis [1, 13, 36].

414           The limitations of this study rely in the primary studies. There were problems regarding  
415 individual reporting for the primary studies, thus we could not do a 2×2 table; in some cases the  
416 lack of appropriate reporting made us judge the study as having an unclear [22, 28, 30, 33, 34] or  
417 high risk of bias [31].

418           The availability of commercial tests demonstrated in recent studies [24, 27] may facilitate  
419 the incorporation of the ELISA test into our clinical practice, allowing standardized use for the  
420 diagnosis of chronic pulmonary aspergillosis and replacing the reference test that still depends on  
421 its in-house performance.

422           Because the global burden of CPA is substantial, mainly as a sequel to pulmonary  
423 tuberculosis (PTB) [37] and especially in countries such as Brazil, which is on a list of 30 countries  
424 representing over 80% of tuberculosis cases worldwide in 2015 [38], there is still a need for well-  
425 designed studies so that the degree of evidence is obtained and demonstrated for the use of the  
426 ELISA test in comparison to the precipitation tests.

427           In conclusion our meta-analysis suggests that the enzyme-linked immunosorbent assay  
428 (ELISA) presented a better accuracy than the precipitation tests (DID and/or CIE) for CPA  
429 diagnosis, and that it can be considered the test of choice in clinical practice.

430

## 431 **Acknowledgments**

432

433

## 434 **References**

435

- 436 1. Page ID, Byanyima R, Hosmane S, Onyachi N, Opira C, Richardson M, Sawyer R,  
437 Sharman A, Denning DW. Chronic pulmonary aspergillosis commonly complicates treated  
438 pulmonary tuberculosis with residual cavitation. *Eur Resp J.* 2019;53: 1801184.
- 439 2. Takazono T, Izumikawa K. Recent Advances in Diagnosing Chronic Pulmonary  
440 Aspergillosis. *Front Microbiol.* 2018;9:1810.
- 441 3. Denning DW, Cadranel J, Beigelman-Aubry C, Ader F, Chakrabarti A, Blot S, Ullmann  
442 AJ, Dimopoulos G, Lange C. Chronic pulmonary aspergillosis: rationale and clinical guidelines  
443 for diagnosis and management. *Eur Respir J.* 2016; 47: 45-68.
- 444 4. Jhun BW, Jeon K, Eom JS, Lee JH, Suh GY, Kwon OJ, Koh W-J. Clinical characteristics  
445 and treatment outcomes of chronic pulmonary aspergillosis. *Med Mycol.* 2013; 51(8): 811-817.
- 446 5. Yao Y, Zhou H, Shen Y, Yang Q, Ye J, Fu Y, Lu G, Lou H, Yu Y, Zhou J. Evaluation of  
447 a quantitative serum *Aspergillus fumigatus*-specific IgM assay for diagnosis of chronic pulmonary  
448 aspergillosis. *Clin Respir J.* 2018; 12(11): 2566-2572.
- 449 6. Kitasato Y, Tao Y, Hoshino T, Tachibana K, Inoshima N, Yoshida M, Takata S,  
450 Okabayashi K, Kawasaki M, Iwanaga T, Aizawa H. Comparison of *Aspergillus* galactomannan  
451 antigen testing with a new cut-off index and *Aspergillus* precipitating antibody testing for the  
452 diagnosis of chronic pulmonary aspergillosis. *Respirology.* 2009;14: 701-708.
- 453 7. van Toorenenbergen, AW. Between-laboratory quality control of automated analysis of  
454 IgG antibodies against *Aspergillus fumigatus*. *Diagn Microbiol Infect Dis.* 2011;74:278-281

- 455 8. Uffredi ML, Mangiapan G, Cadranel J, Kac G. Significance of *Aspergillus fumigatus*  
456 Isolation from Respiratory Specimens of Nongranulocytopenic Patients. Eur J Clin Microbiol  
457 Infect Dis. 2003;22:457-462.
- 458 9. Longbottom JL, Pepys J. Pulmonary aspergillosis: diagnostic and immunological  
459 significance of antigens and C-substance in *Aspergillus fumigatus*. J Pathol Bacteriol.  
460 1964;88(1):141-151.
- 461 10. Ward GW, Kohler PF. Counterelectrophoresis as a Rapid Method for the Detection of  
462 *Aspergillus* Precipitins in Pulmonary Disease. Chest.1973; 63(4): 49S-51S.
- 463 11. Coleman RM, Kaufman L. Use of the Immunodiffusion Test in the Serodiagnosis of  
464 Aspergillosis. Appl Microbiol. 1972;23:301-308.
- 465 12. Patterson TF, Thompson GR, Denning DW, Fishman JA, Hadley S, Herbrecht R,  
466 Kontoyiannis DP, Marr KA, Morrison VA, Nguyen MH, Segal BH, Steinbach WJ, Stevens DA,  
467 Walsh TJ, John R. Wingard JR, Young J-AH, Bennett JE. Practice Guidelines for the Diagnosis  
468 and Management of Aspergillosis: 2016 Update by the Infectious Diseases Society of America.  
469 Clin Infect Dis. 2016;63:e1-e60.
- 470 13. Page ID, Richardson MD, Denning DW. Siemens Immulite *Aspergillus*-specific IgG assay  
471 for chronic pulmonary aspergillosis diagnosis. Medl Mycol, 2018; 0(0):1-8.
- 472 14. Barton RC. *Aspergillus* precipitins and serology. In: Pasqualotto AC, editor. Aspergillosis:  
473 from diagnosis to prevention. Dordrecht: Springer; 2010. pp. 159-69.
- 474 15. McInnes MDF, Moher D, Thombs BD, McGrath TA, Bossuyt PM, PRISMA-DTA Group.  
475 Preferred Reporting Items for a Systematic Review and Meta-analysis of Diagnostic Test  
476 Accuracy Studies: The PRISMA-DTA Statement. JAMA. 2018;319(4):388-396.



- 477 16. Bossuyt PM, Reitsma JB, Bruns DE, Gatsonis CA, Glasziou PP, Irwig L, Lijmer JG, Moher  
478 D, Rennie D, de Vet HC, Kressel HY, Rifai N, Golub RM, Altman DG, Hooft L, Korevaar DA,  
479 Cohen JF. STARD 2015: An Updated List of Essential Items for Reporting Diagnostic Accuracy  
480 Studies. *Radiology*. 2015; 277(3): 826-832.
- 481 17. Deeks J, Bossuyt P, Gatsonis C. *Cochrane Handbook for Systematic Reviews of Diagnostic  
482 Test Accuracy*. In: 1.0.0 edn: The Cochrane Collaboration; 2013.
- 483 18. Whiting PF, Rutjes AW, Westwood ME, Mallett S, Deeks JJ, Reitsma JB, Leeflang MM,  
484 Sterne JA, Bossuyt PM. QUADAS-2: a revised tool for the quality assessment of diagnostic  
485 accuracy studies. *Ann Intern Med*. 2011;155:529-536.
- 486 19. Jaeschke R. Users' Guides to the Medical Literature. *JAMA*, 1994;271(9): 703-707.
- 487 20. Youden WJ. Index for Rating Diagnostic Tests. *Cancer*.1950; 3(1):32-35.
- 488 21. Higgins JP, Thompson SG, Deeks JJ, Altman DG. Measuring inconsistency in meta-  
489 analyses. *BMJ*. 2003;327:557-560.
- 490 22. Kurup VP, Resnick A, Scribner GH, Kalbfleisch JH, Fink JN. Comparison of antigens and  
491 serological methods in *Aspergillus fumigatus* antibody detection. *Mykosen*.1984;27 (1):43-50.
- 492 23. Azevedo PZ, Sylvestre TF, Cavalcante RS, Carvalho LR, Moris DV, Oliveira MLCS,  
493 Mendes RP. Evaluation of the double agar gel immunodiffusion test and of the enzyme-linked  
494 immunosorbent assay in the diagnosis and follow-up of patients with chronic pulmonary  
495 aspergillosis. *PLoS One*. 2015; 10(8): 1-16.
- 496 24. Page ID, Richardson MD, Denning DW. Comparison of six *Aspergillus*-specific IgG  
497 assays for the diagnosis of chronic pulmonary aspergillosis (CPA). *J Infect*. 2016;72(2): 240-9.

- 498 25. Fujiuchi S, Fujita Y, Suzuki H, Doushita K, Kuroda H, Takahashi M, Yamazaki Y, Tsuji  
499 T, Fujikane T, Osanai S, Sasaki T, Ohsakic Y. Evaluation of a quantitative serological assay for  
500 diagnosing chronic pulmonary aspergillosis. J Clin Microbiol.2016; 54:1496-1499.
- 501 26. Dumollard C, Bailly S, Perriot S, Brenier-Pinchart MP, Saint-Raymond C, Camara B,  
502 Gangneux JP, Persat F, Valot S, Grenouillet F, Pelloux H, Pinel C, Cornet M. Prospective  
503 Evaluation of a New *Aspergillus* IgG Enzyme Immunoassay Kit for Diagnosis of Chronic and  
504 Allergic Pulmonary Aspergillosis. J Clin Microbiol. 2016;54(5):1236-1242.
- 505 27. Sehgal IS, Choudhary H, Dhooria S, Aggarwal AN, Garg M, Chakrabarti A, Agarwal R.  
506 Diagnostic cut-off of *Aspergillus fumigatus* -specific IgG in the diagnosis of chronic pulmonary  
507 aspergillosis. Mycoses. 2018; 61(10):770-776.
- 508 28. Yamamoto S, Toida I, Wada M, Hosojima S, Kudou S. Serological diagnosis of pulmonary  
509 aspergillosis by Elisa. Kekkaku. 1989;64(1):15-24.
- 510 29. Baxter CG, Denning DW, Jones AM, Todd A, Moore CB, Richardson MD. Performance  
511 of two *Aspergillus* IgG EIA assays compared with the precipitin test in chronic and allergic  
512 aspergillosis. Clin Microbiol Infect. 2013;19(4):E197-E204.
- 513 30. Sarfati J, Monod M, Recco P, Sulahian A, Pinel C, Candolf E, Fontainea T, Debeaupuisa  
514 J-P, Tabouretg M, Latge J-P. Recombinant antigens as diagnostic markers for aspergillosis. Diagn  
515 Microbiol Infect Dis. 2006;55:279-291.
- 516 31. Guitard J, Sendid B, Thorez S, Gits M, Hennequina C. Evaluation of a Recombinant  
517 Antigen-Based Enzyme Immunoassay for the Diagnosis of Noninvasive Aspergillosis. J Clin  
518 Microbiol. 2012; 50(3):762765.
- 519 32. Faux A, Shale DJ, Lane DJ. Precipitins and specific IgG antibody to *Aspergillus fumigatus*  
520 in a chest unit population. Thorax. 1992;47:48-52.

- 521 33. Kauffman HF, Beaumont F, Mews H, Heide S van der, Vries K. Comparison of antibody  
522 measurements against *Aspergillus fumigatus* by means of double-diffusion and enzyme-linked  
523 immunosorbent assay (ELBA). J Allergy Clin Immunol. 1983;72(3):255-261.
- 524 34. Mishra SK, Falkenberg S, Masihi N. Efficacy of enzyme-linked immunosorbent assay in  
525 serodiagnosis of aspergillosis. J Clin Microbiol. 1983;17(4):708-710.
- 526 35. Schweer KE, Bangard C, Hekmat K, Cornely O A. Chronic pulmonary aspergillosis.  
527 Mycoses. 2013; 57(5): 257-270.
- 528 36. Oladele RO, Ijurhe NK, Foden P, Akanmu AS, Gbaja-Biamila T, Nwosu A, Ekundayo  
529 HA, Ogunsola FT, Richardson MD, Denning DW. Chronic pulmonary aspergillosis as a cause of  
530 smear-negative TB and/or TB treatment failure in Nigerians. Int J Tuberc Lung Dis.  
531 2017;21(9):1056-1061.
- 532 37. Denning D, Pleuvry A, Cole D. Global burden of chronic pulmonary aspergillosis as a  
533 sequel to pulmonary tuberculosis. Bull World Health Organ. 2011; 89(12): 864-872.
- 534 38. World Health Organization. Global Tuberculosis Report 2016. Geneva: World Health  
535 Organization; 2016.

536

537

538

539

540

541

542

543 **Supporting information captions**

544

545 **S1 Table. Characterization of the studies included in this systematic review and meta-**  
546 **analysis.**

547 **ELISA: Enzyme-Linked Immunosorbent Assay; AF: *Aspergillus fumigatus*; Ag: antigen;**

548 **DID: Double Immunodiffusion; CPA: chronic pulmonary aspergillosis patients; OD: optical**

549 **density; CIE: counterimmunoelectrophoresis; TMB: 3,3',5,5'-Tetramethylbenzidine; pNPP:**

550 **Alkaline Phosphatase Yellow; OPD: o-Phenylenediamine; RNU: 18-kDa ribonuclease;**

551 **DPPV: 88-kDa dipeptidylpeptidase; CAT: 360-kDa catalase**

552

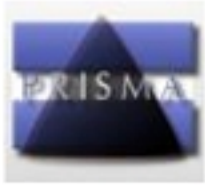

## PRISMA 2009 Flow Diagram

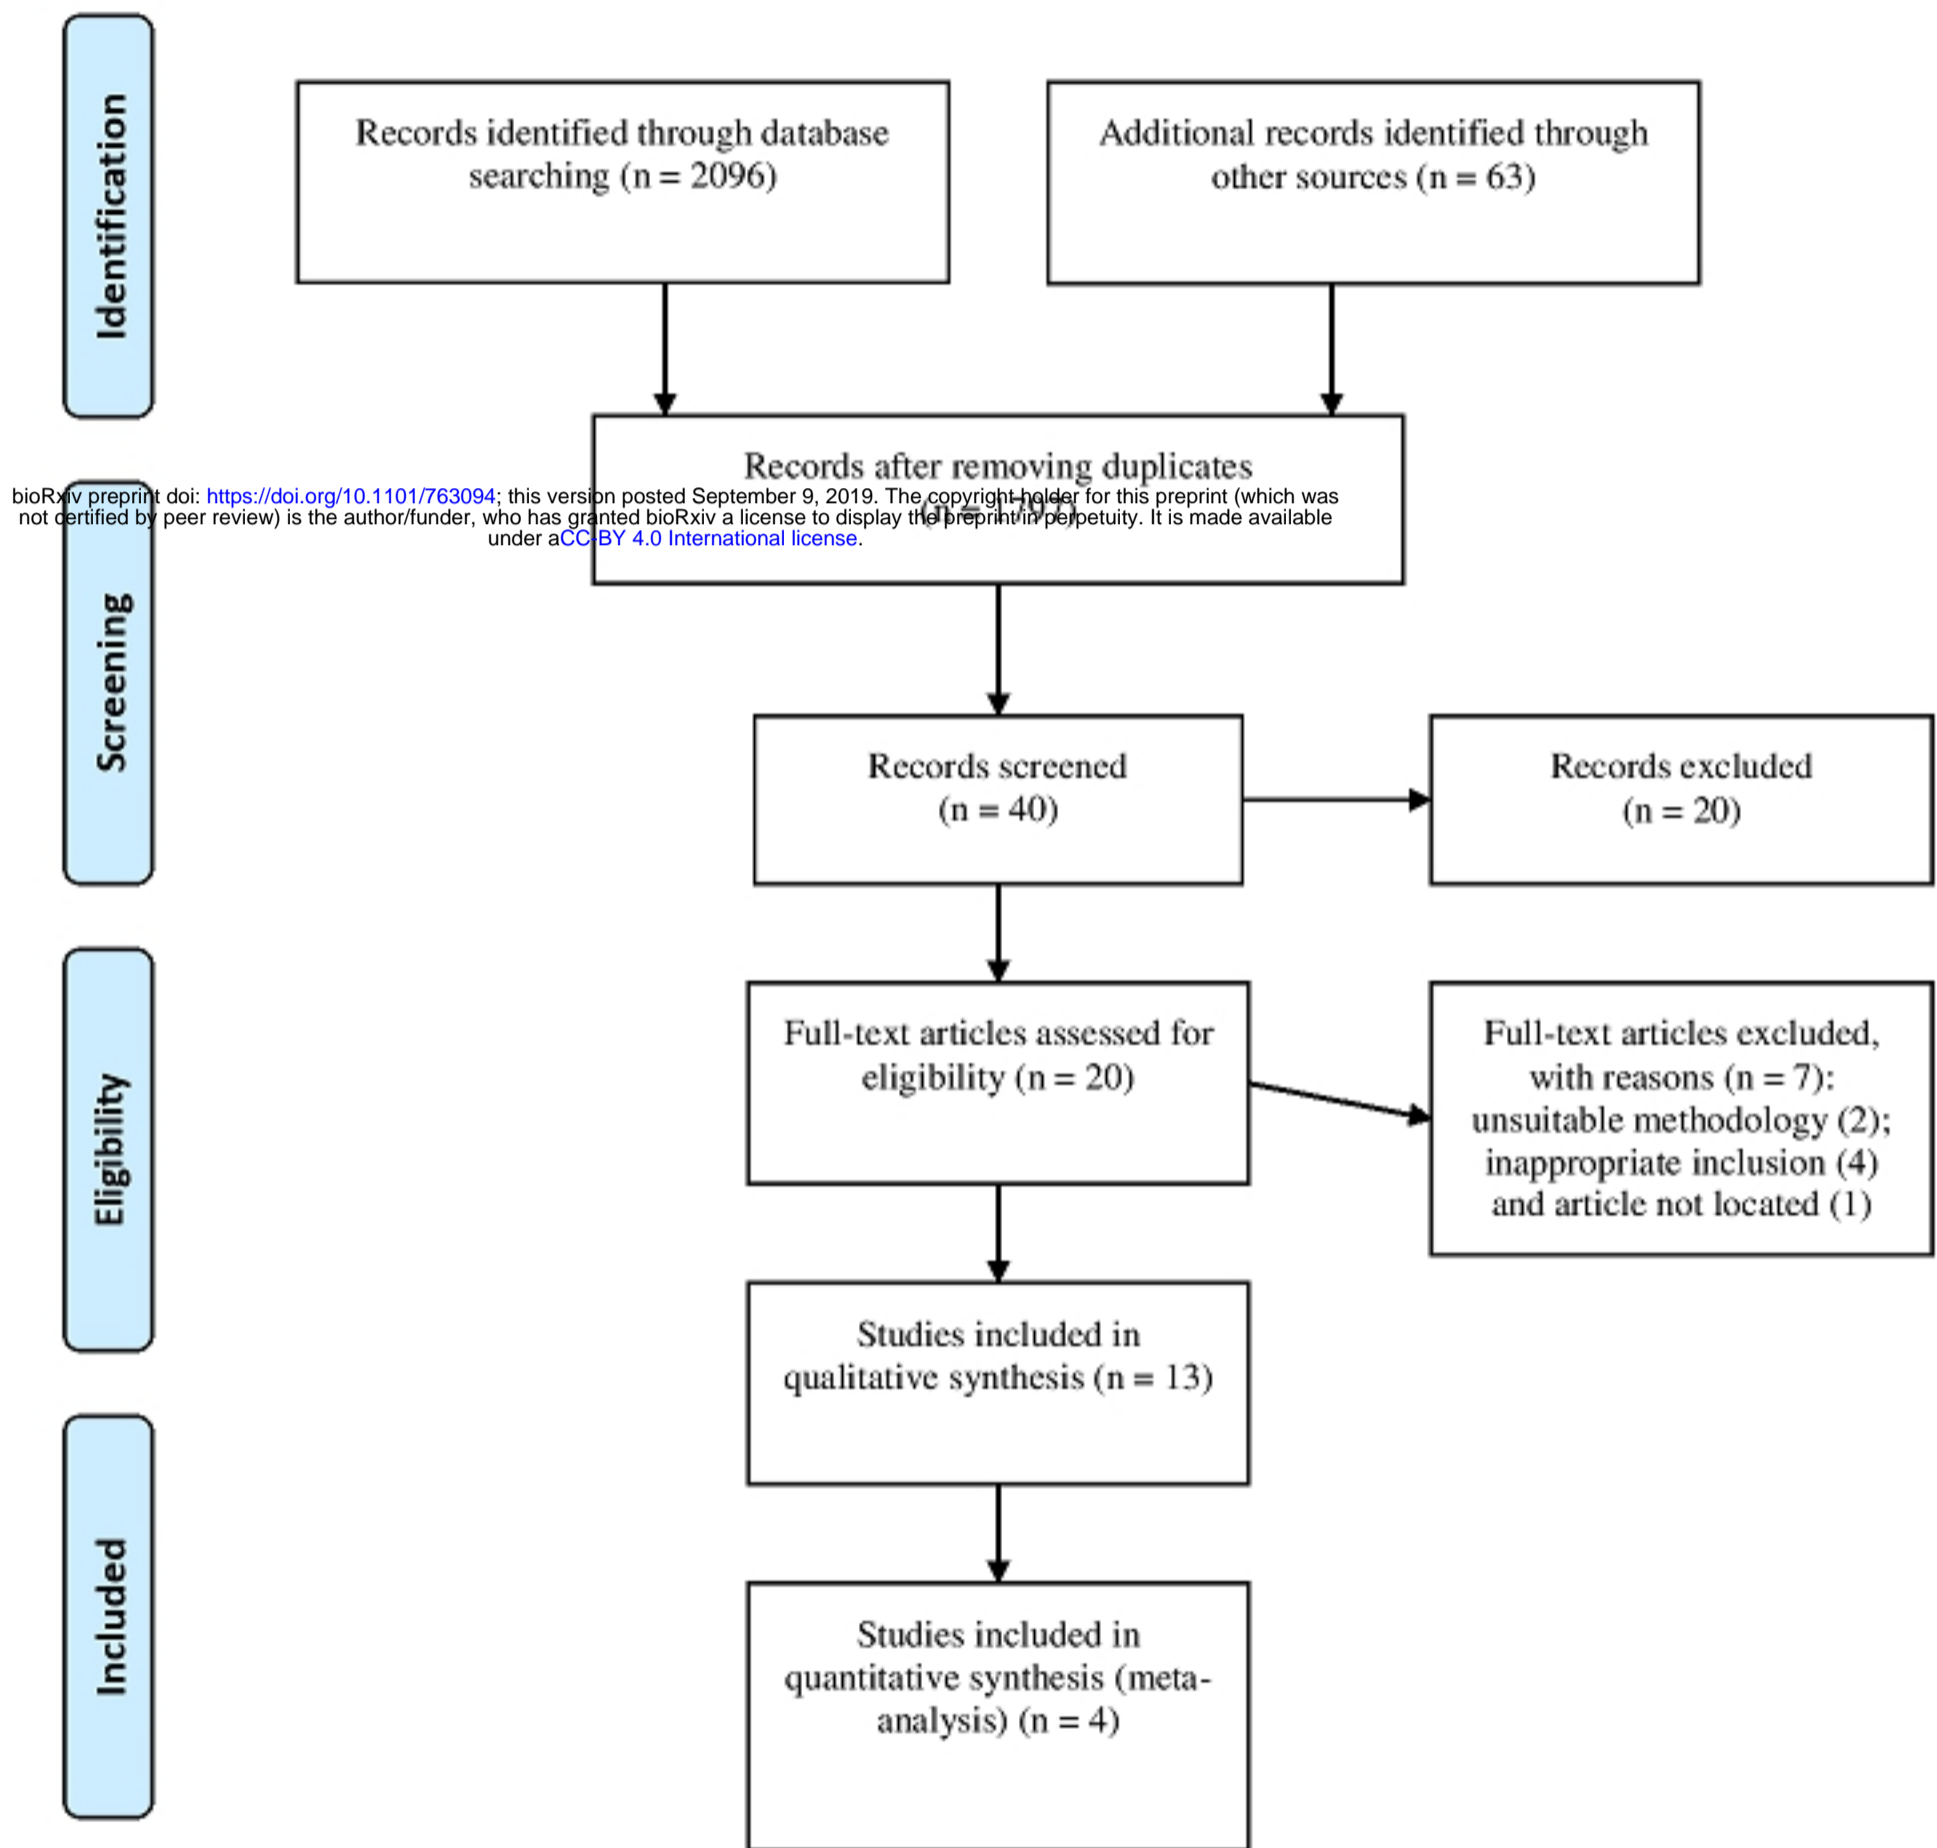

From: Moher D, Liberati A, Tetzlaff J, Altman DG, The PRISMA Group (2009). Preferred Reporting Items for Systematic Reviews and Meta-Analyses: The PRISMA Statement. PLoS Med 6(7): e1000097. doi:10.1371/journal.pmed1000097

For more information, visit [www.prisma-statement.org](http://www.prisma-statement.org).

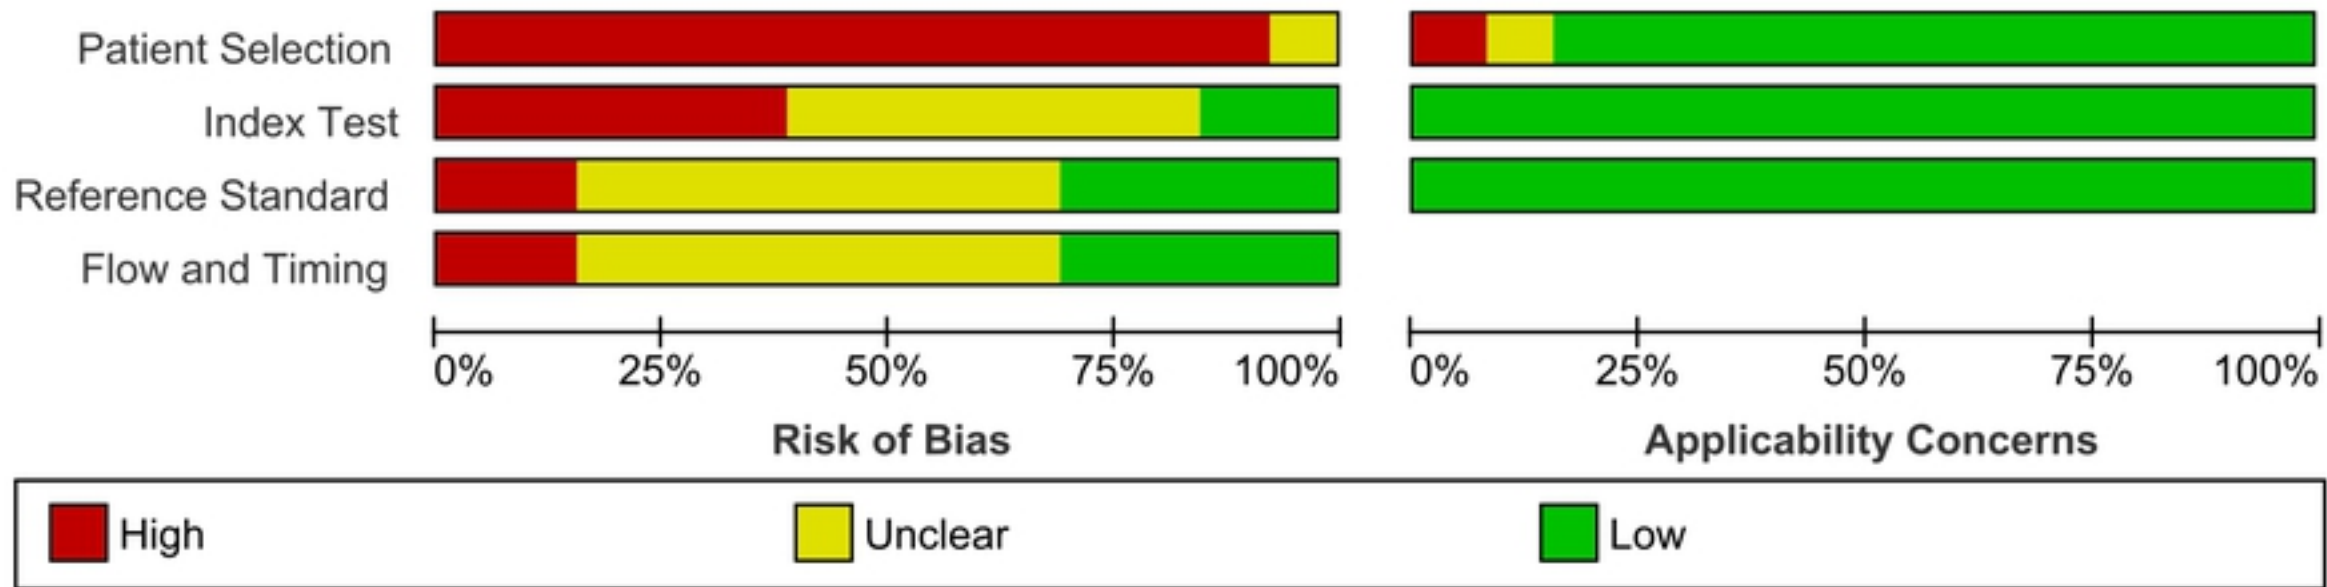

Fig2.TIFF

**Risk of Bias**

**Applicability Concerns**

|                | Risk of Bias      |            |                    |                 | Applicability Concerns |            |                    |
|----------------|-------------------|------------|--------------------|-----------------|------------------------|------------|--------------------|
|                | Patient Selection | Index Test | Reference Standard | Flow and Timing | Patient Selection      | Index Test | Reference Standard |
| Azevedo 2015   | -                 | -          | +                  | +               | +                      | +          | +                  |
| Baxter 2013    | -                 | +          | +                  | ?               | +                      | +          | +                  |
| Dumollard 2016 | ?                 | ?          | -                  | -               | +                      | +          | +                  |
| Faux 1992      | -                 | -          | +                  | +               | +                      | +          | +                  |
| Fujiuchi 2016  | -                 | -          | ?                  | -               | -                      | +          | +                  |
| Guitard 2012   | -                 | -          | -                  | ?               | +                      | +          | +                  |
| Kauffman 1983  | -                 | ?          | ?                  | ?               | +                      | +          | +                  |
| Kurup 1984     | -                 | ?          | ?                  | ?               | +                      | +          | +                  |
| Mishra 1983    | -                 | ?          | ?                  | ?               | +                      | +          | +                  |
| Page 2016      | -                 | -          | ?                  | +               | +                      | +          | +                  |
| Sarfati 2006   | -                 | ?          | ?                  | ?               | +                      | +          | +                  |
| Sehgal 2018    | -                 | +          | +                  | +               | +                      | +          | +                  |
| Yamamoto 1988  | -                 | ?          | ?                  | ?               | ?                      | +          | +                  |

bioRxiv preprint doi: <https://doi.org/10.1101/763094>; this version posted September 9, 2019. The copyright holder for this preprint (which was not certified by peer review) is the author/funder, who has granted bioRxiv a license to display the preprint in perpetuity. It is made available under aCC-BY 4.0 International license.

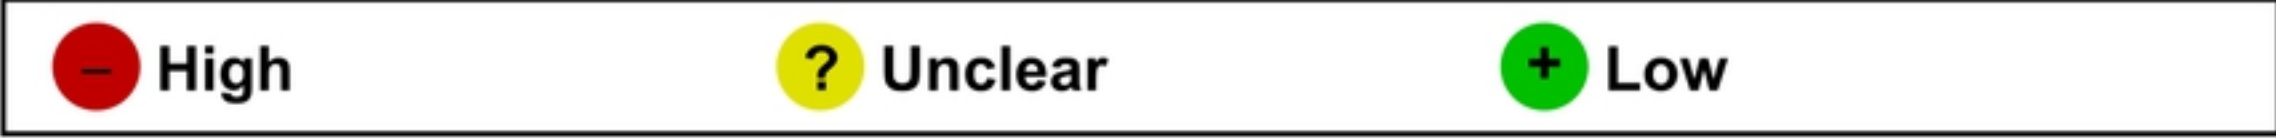

Fig3.TIFF



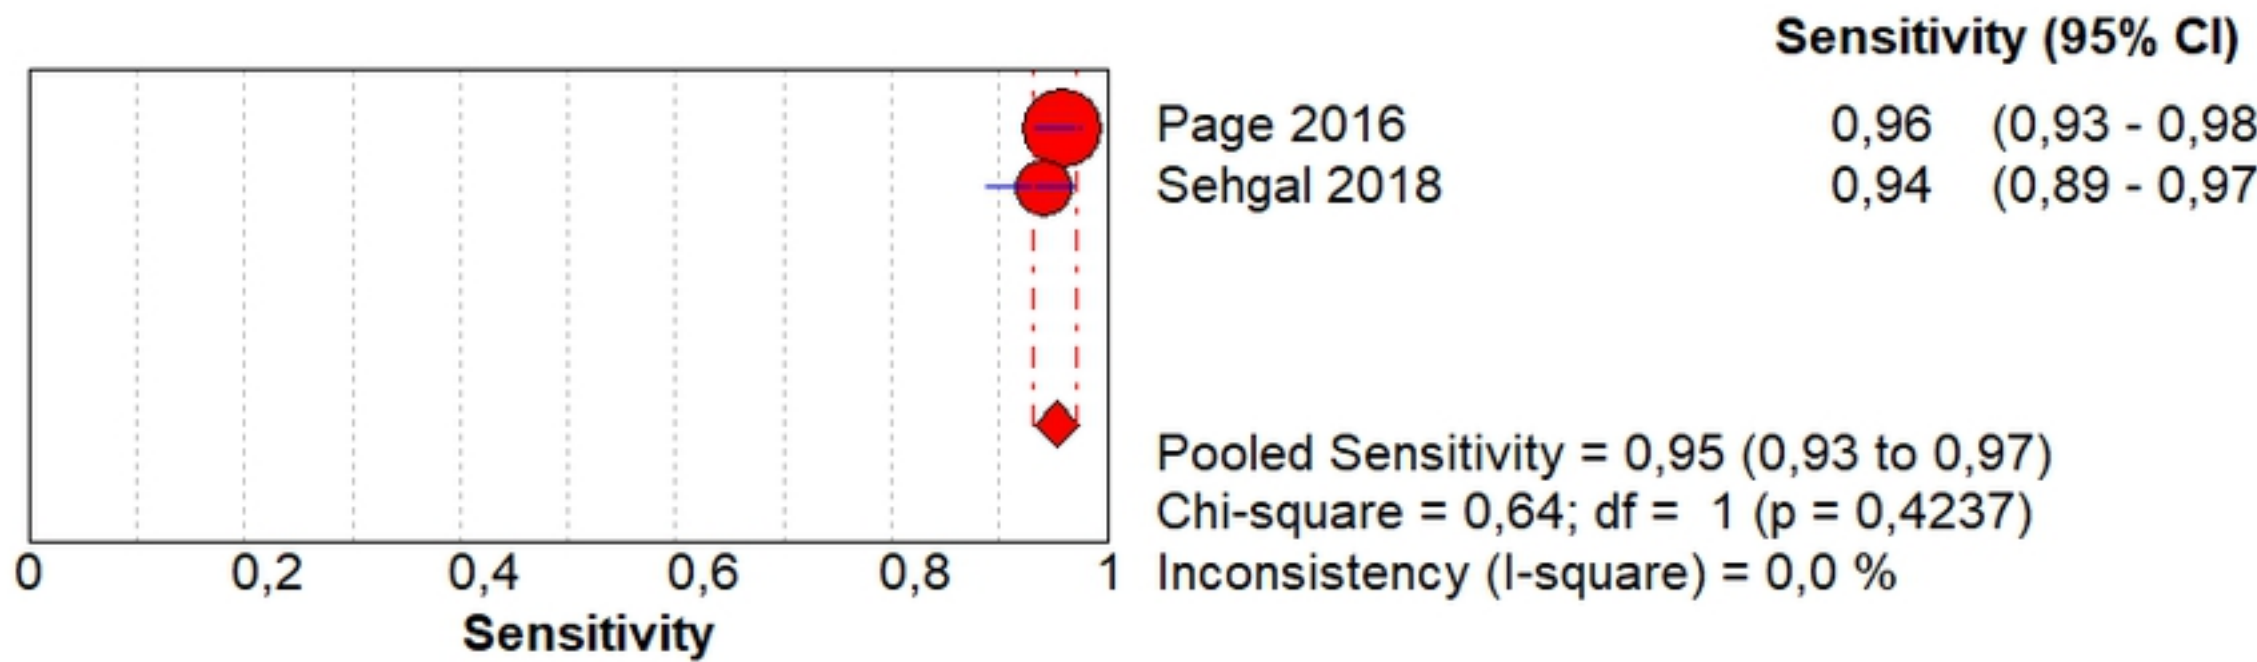



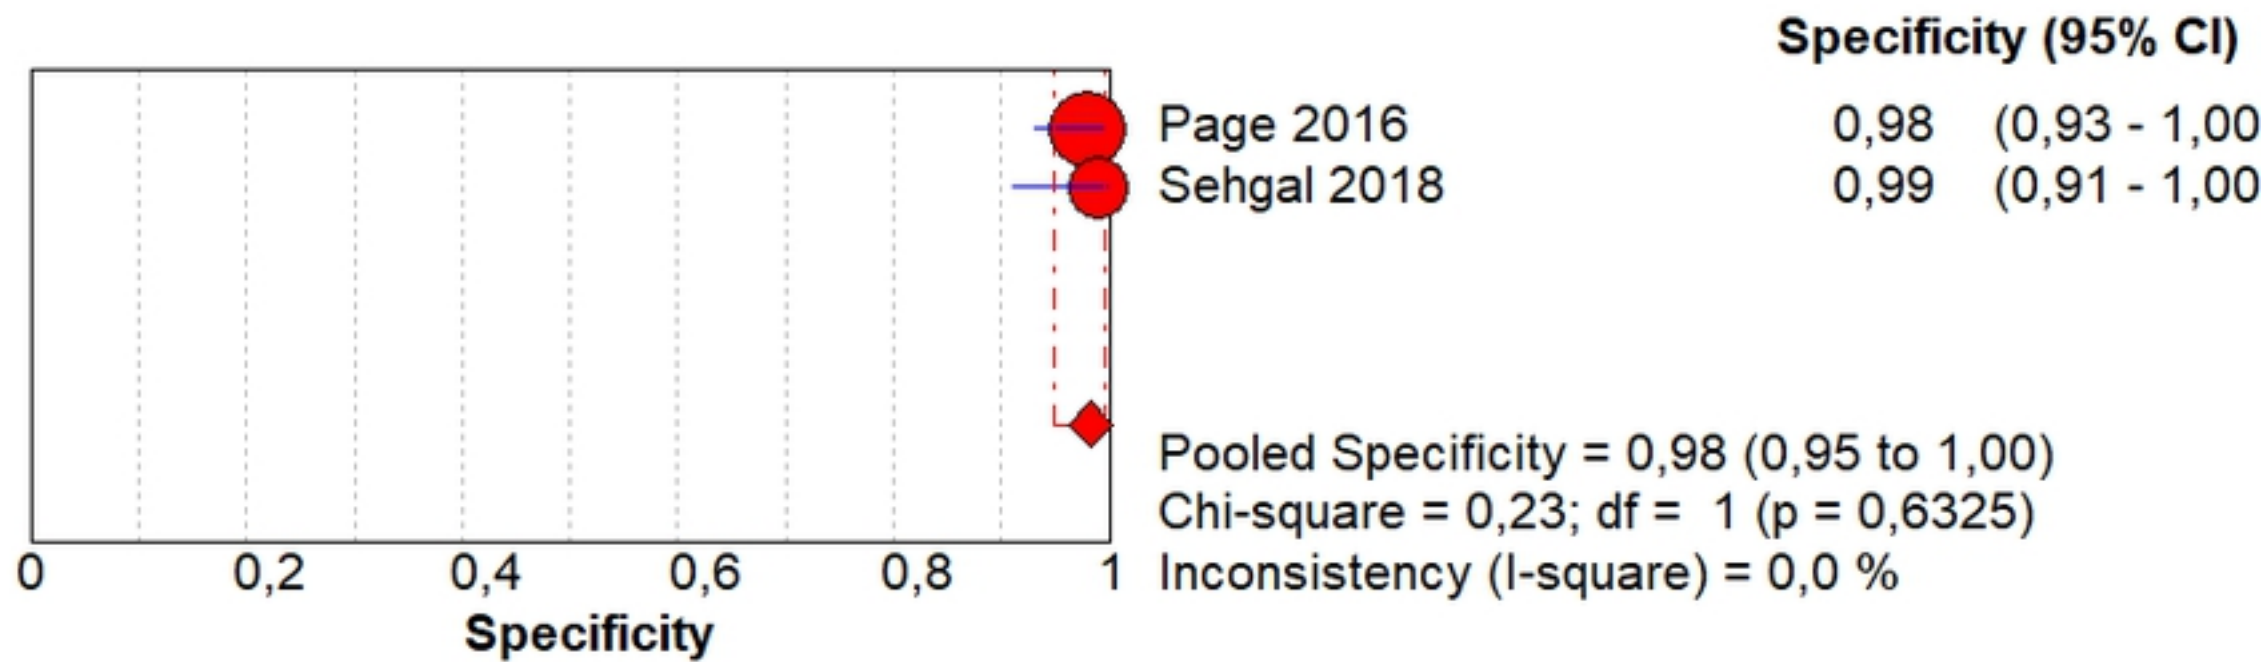

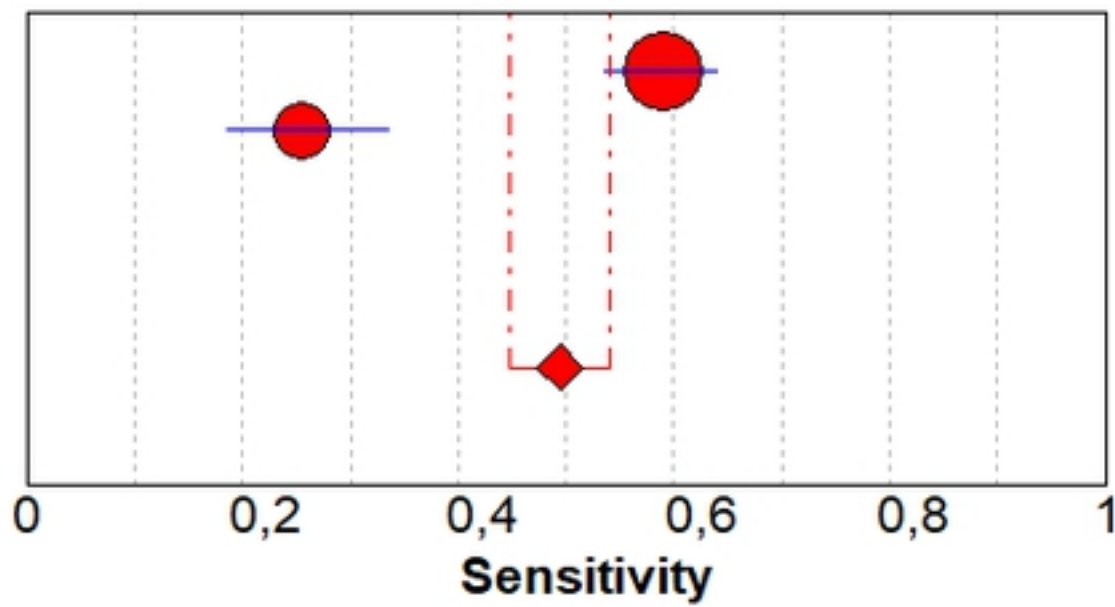

Page 2016  
Sehgal 2018

**Sensitivity (95% CI)**

0,59 (0,54 - 0,64)  
0,26 (0,18 - 0,34)

Pooled Sensitivity = 0,49 (0,45 to 0,54)  
Chi-square = 45,11; df = 1 (p = 0,0000)  
Inconsistency (I-square) = 97,8 %

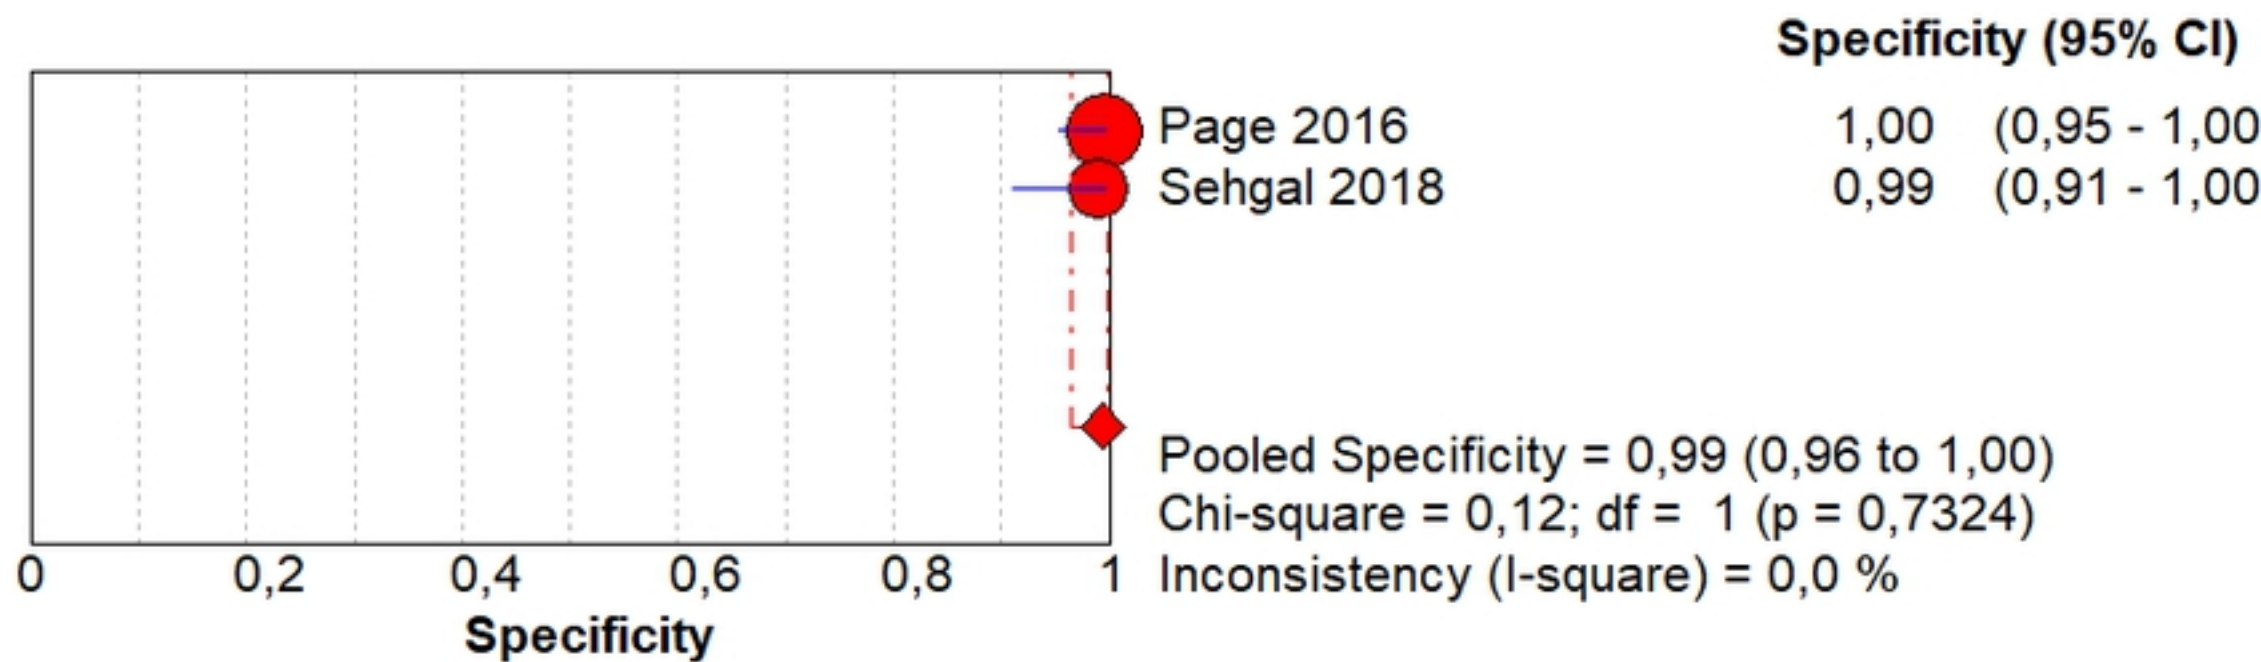

| Reference              | Country        | Test index and antigens                                                                                                                                                                                          | Reference test and antigens                                                          | CPA | Healthy Control | Study Design       | Ag/well concentration Elisa | Dilution of the secondary antibody Elisa | Elisa cut-off                                                                           | Elisa substrate | Ag Concentration on DID and/or CIE                   | Meta-analysis                                   |
|------------------------|----------------|------------------------------------------------------------------------------------------------------------------------------------------------------------------------------------------------------------------|--------------------------------------------------------------------------------------|-----|-----------------|--------------------|-----------------------------|------------------------------------------|-----------------------------------------------------------------------------------------|-----------------|------------------------------------------------------|-------------------------------------------------|
| Azevedo et al., 2015   | Brazil         | a. Elisa 1 (AF)<br>b. Elisa 2 (AF pool, <i>A. flavus</i> and <i>A. niger</i> )                                                                                                                                   | a. IDD 1 (AF)<br>b. IDD 2 (pool of AF, <i>A. flavus</i> and <i>A. niger</i> )        | 22  | 200             | Case-control       | 10mcg/well                  | 1:3000                                   | a. Elisa 1<br>- 0.12 (OD),<br>- 0.13 (OD),<br>b. Elisa 2<br>- 0.09 (OD),<br>- 0.10 (OD) | TMB             | Not reported                                         | Yes                                             |
| Baxter et al., 2013    | United Kingdom | a. ImmunoCap (extract of AF conidia and mycelium)<br>b. Platelia (purified, unspecified recombinant antigen – (AF))                                                                                              | CIE (AF somatic; culture filtrate antigens)                                          | 116 | -               | Prospective cohort | Not reported                | Not reported                             | a. >40mg/mL,<br>b. ≥10au/mL                                                             | -               | AFS - 20mg/mL and culture filtrate antigens - 2mg/mL | No (without healthy control)                    |
| Damollard et al., 2016 | France         | a. Elisa Bordier – two recombinant antigens with somatic and metabolic antigens from AF<br>b. Platelia Bio-Rad – one recombinant antigen AF<br>c. Elisa Virion/Serion – antigenic composition not available (AF) | CIE (somatic and metabolic antigen from AF different from those used in the Bordier) | 129 | -               | Prospective cohort | Not reported                | Not reported                             | a. ≥1 OD<br>b. ≥10au/mL<br>c. >70au/mL                                                  | Not reported    | 10 µL                                                | No (without healthy control)                    |
| Faux et al., 1992      | Not reported   | In-house ELISA (AF)                                                                                                                                                                                              | DID (4 AF extracts)                                                                  | 11  | 18              | Case-control       | Not reported                | Not reported                             | Not reported                                                                            | Not reported    | 20mg/mL                                              | No (population under 20 and without ELISA date) |

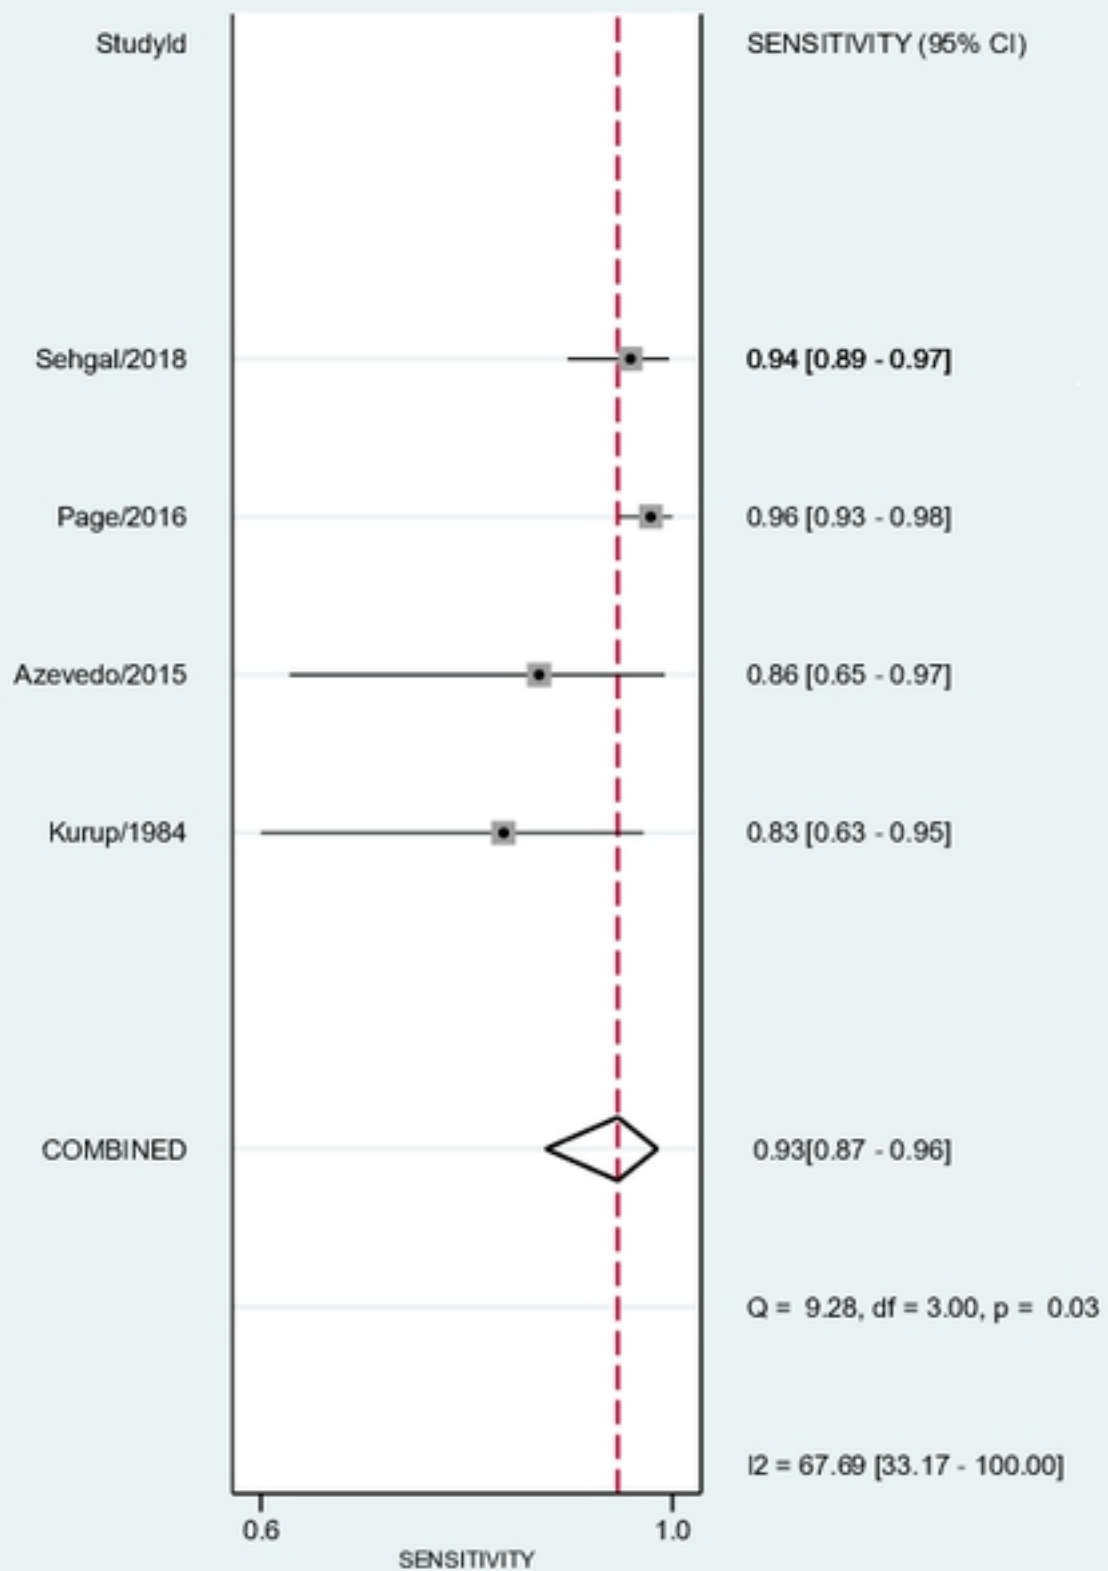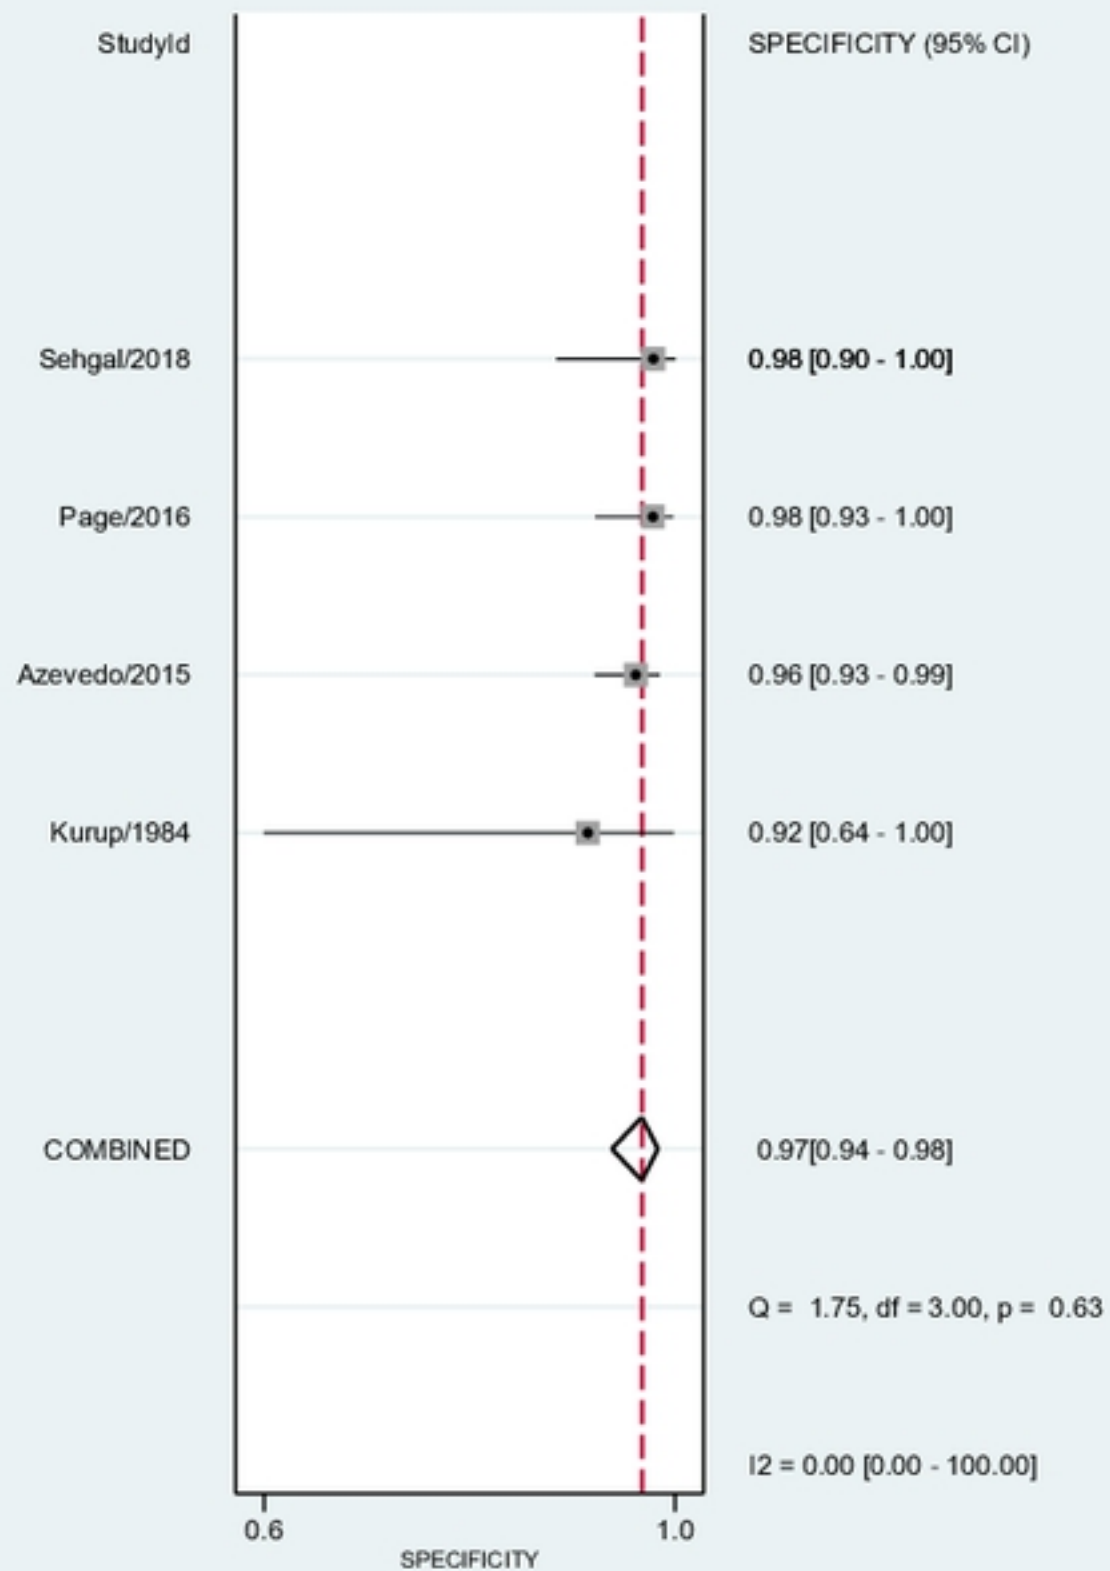

FIG4.TIFF

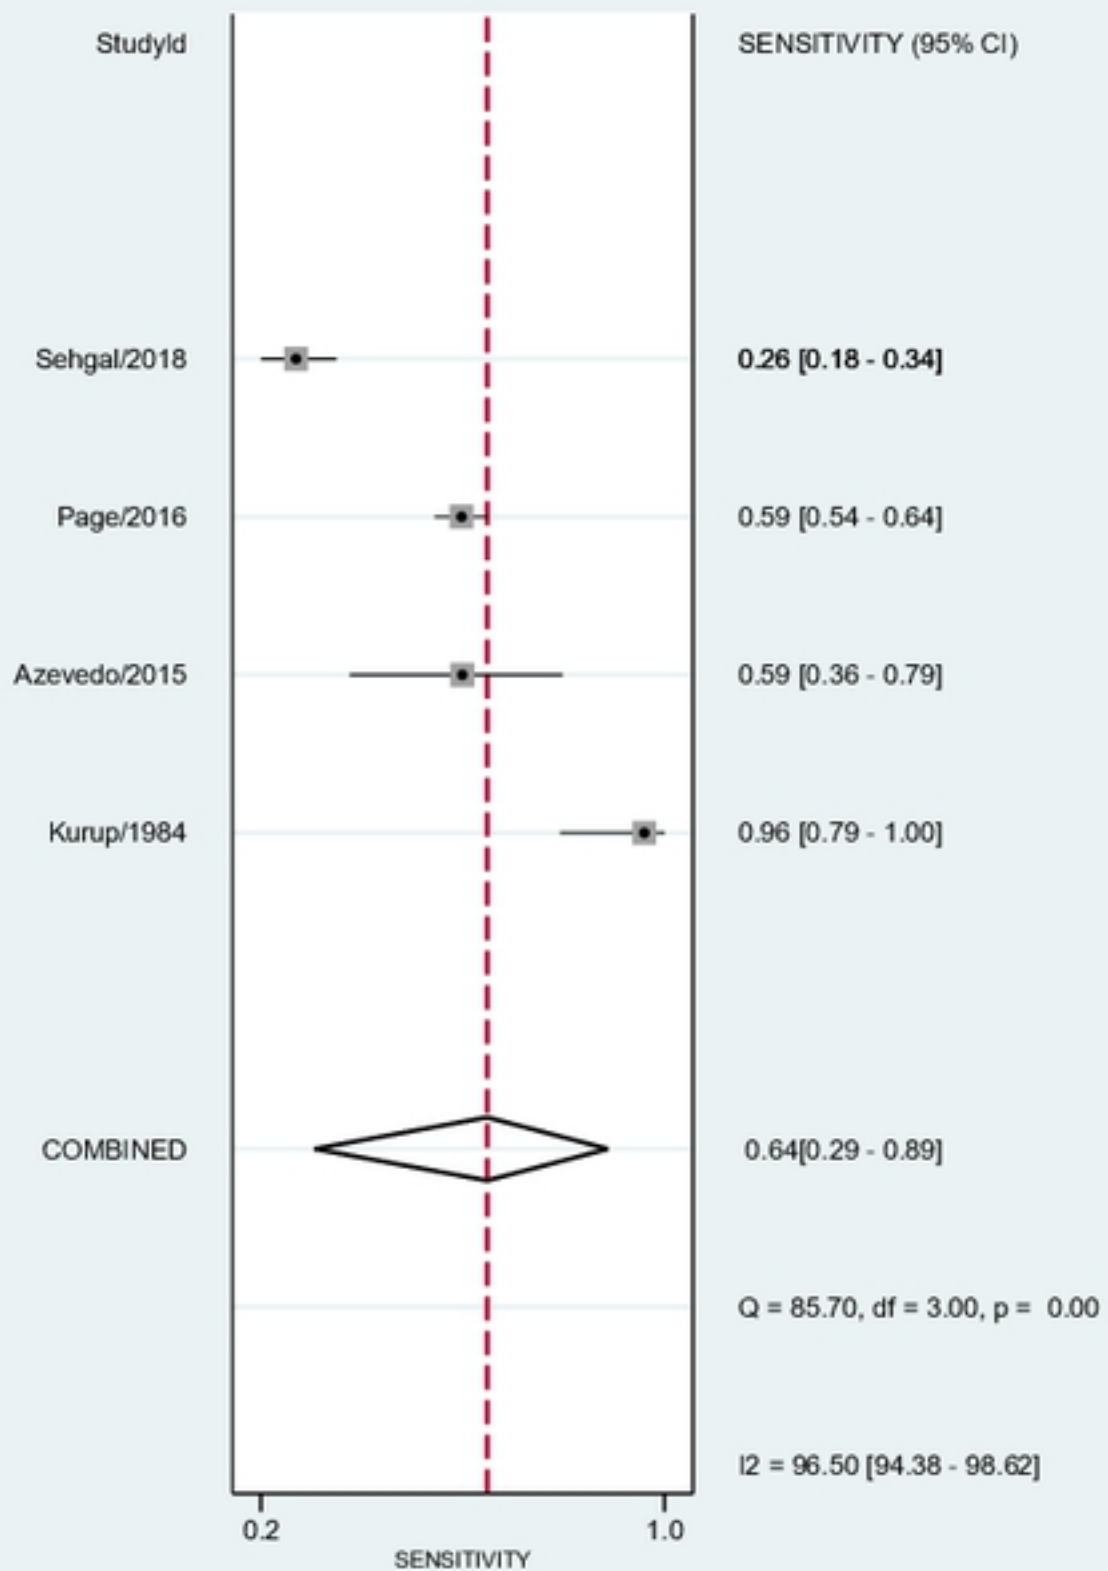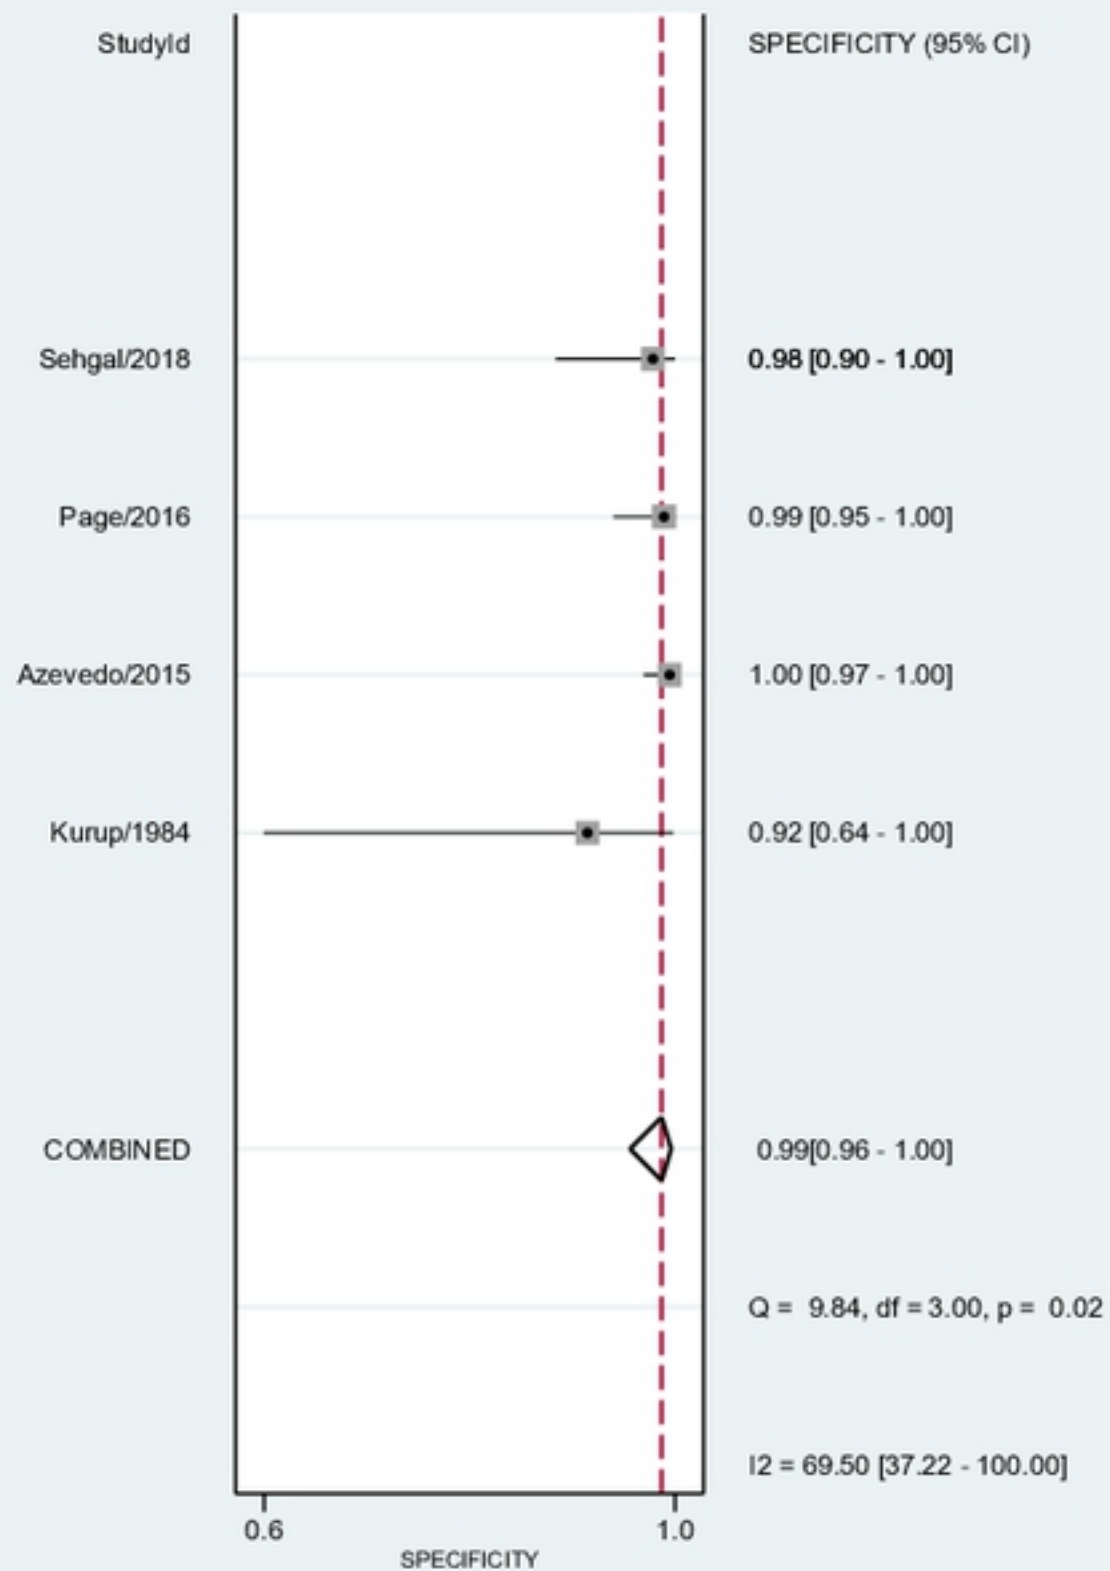

Fig5.TIFF

bioRxiv preprint doi: <https://doi.org/10.1101/763094>; this version posted September 9, 2019. The copyright holder for this preprint (which was not certified by peer review) is the author/funder, who has granted bioRxiv a license to display the preprint in perpetuity. It is made available under aCC-BY 4.0 International license.

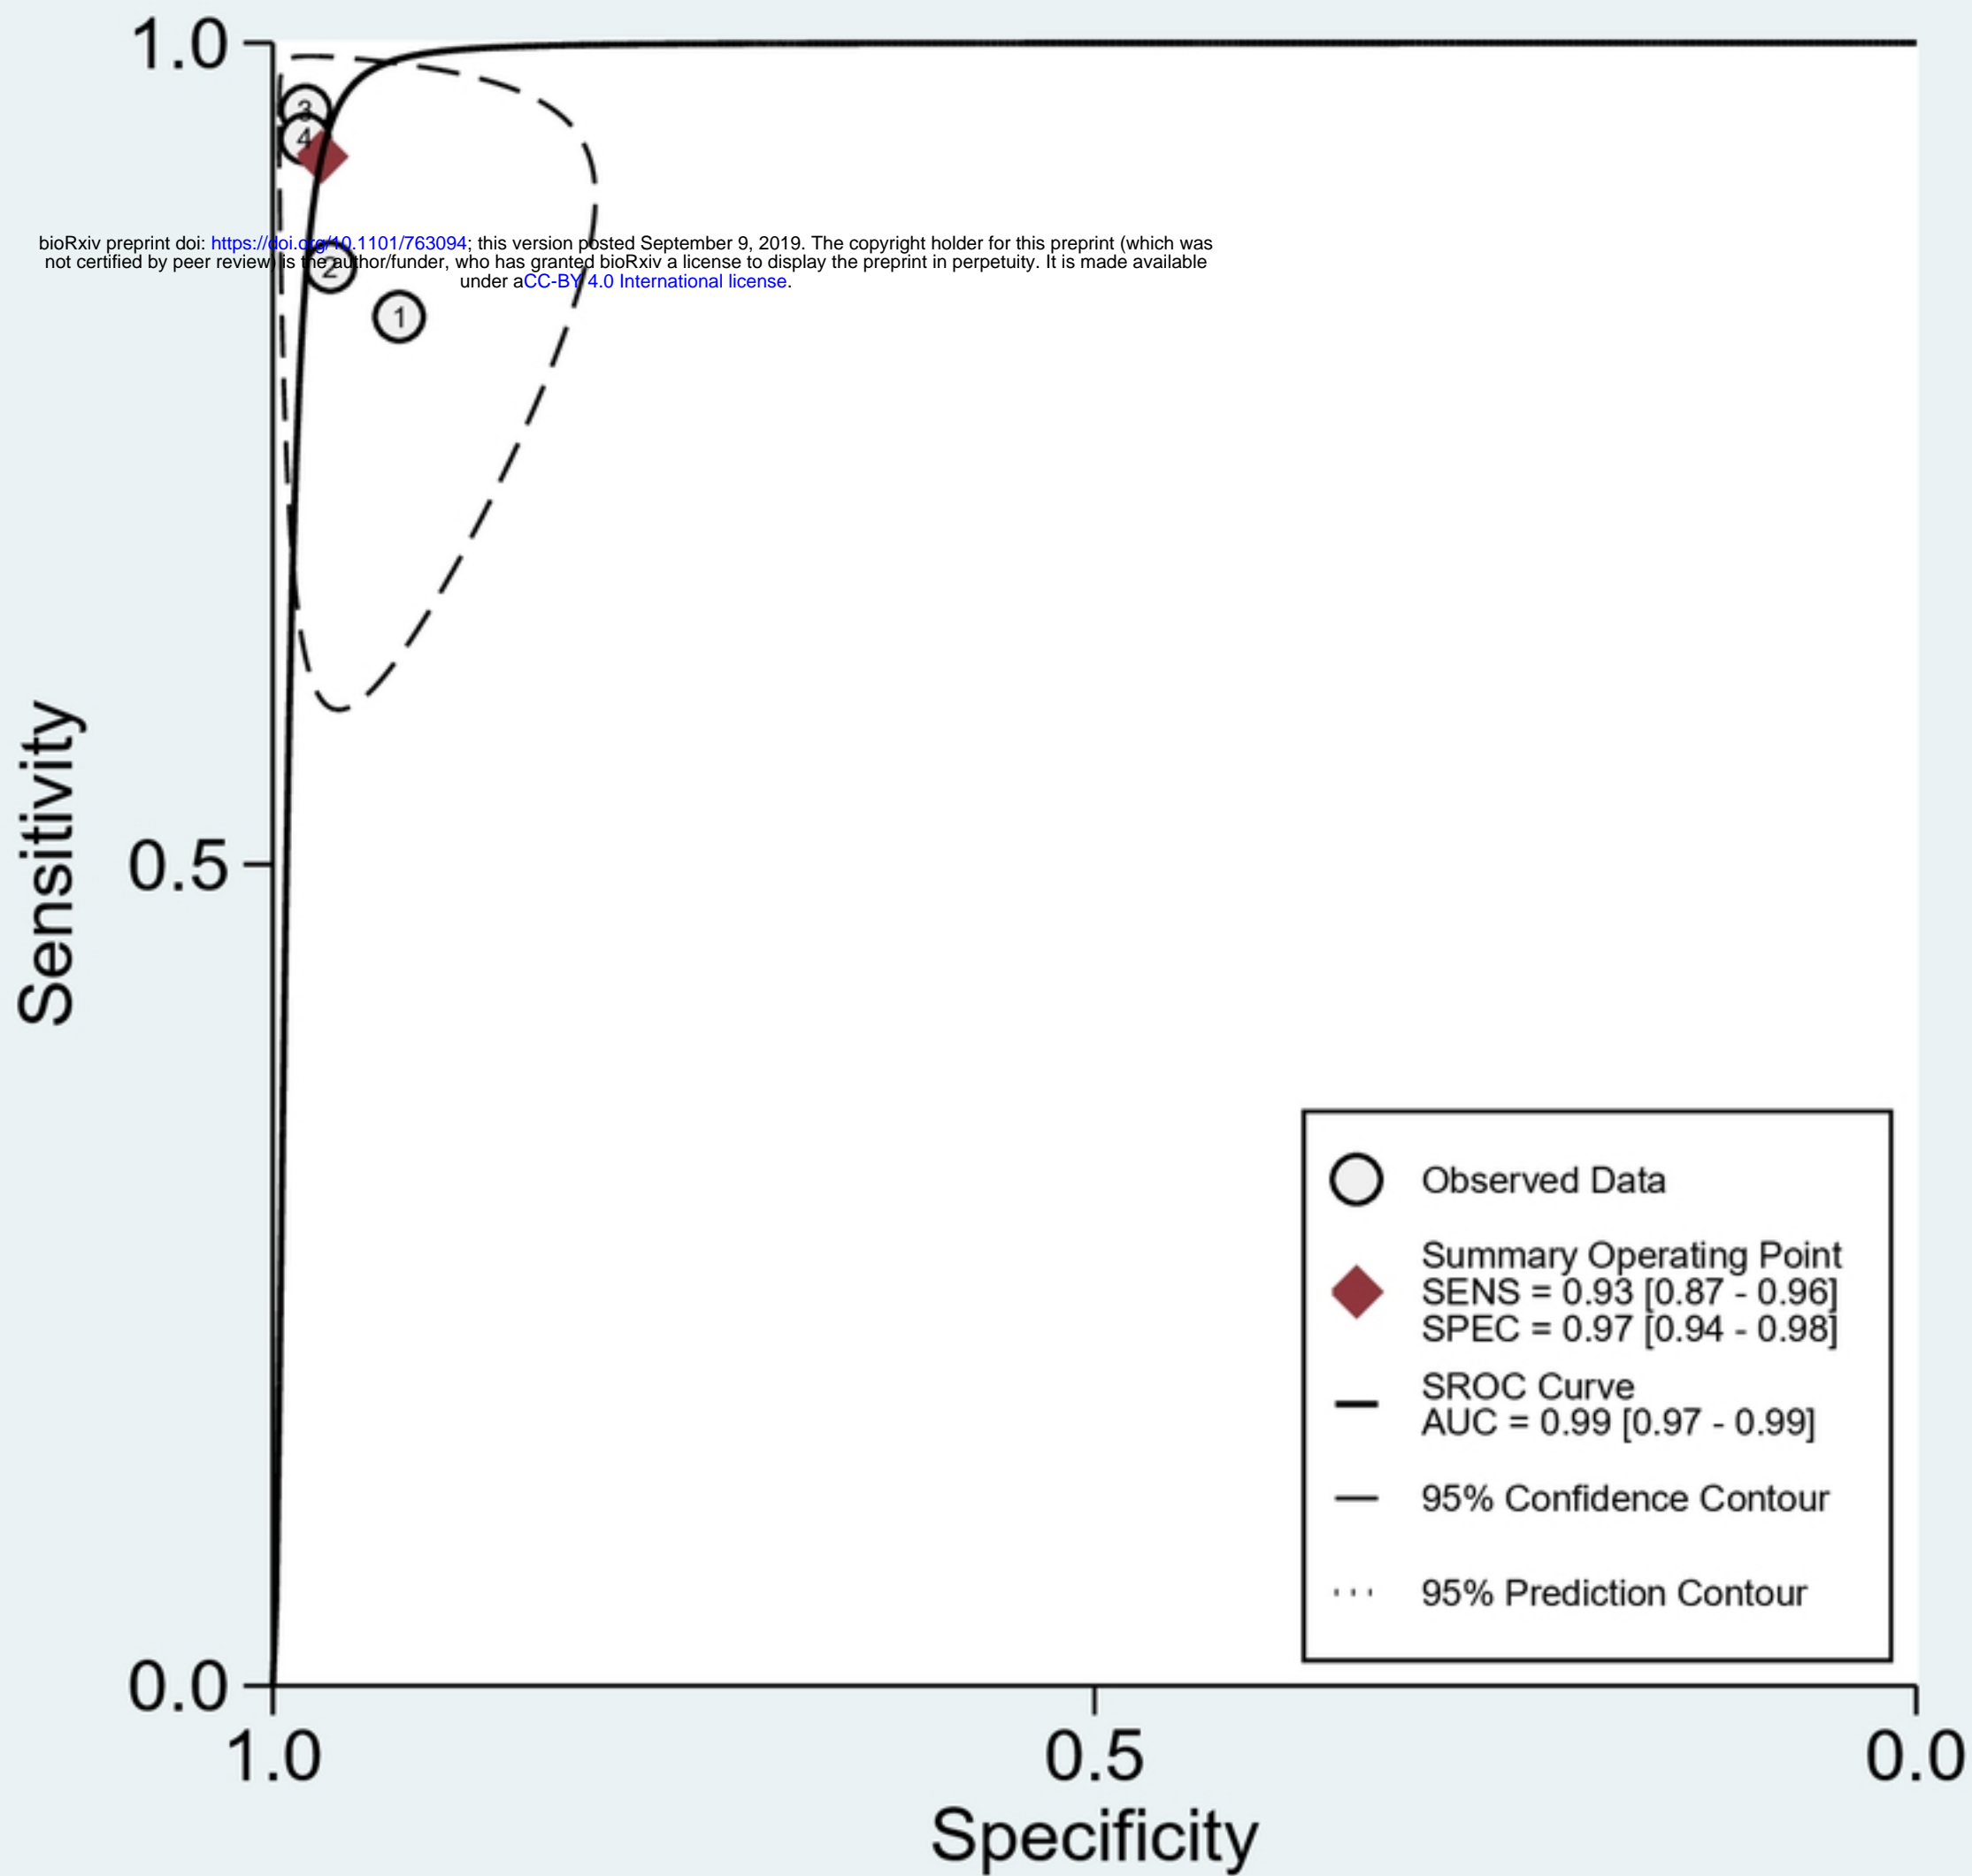

bioRxiv preprint doi: <https://doi.org/10.1101/763094>; this version posted September 9, 2019. The copyright holder for this preprint (which was not certified by peer review) is the author/funder, who has granted bioRxiv a license to display the preprint in perpetuity. It is made available under aCC-BY 4.0 International license.

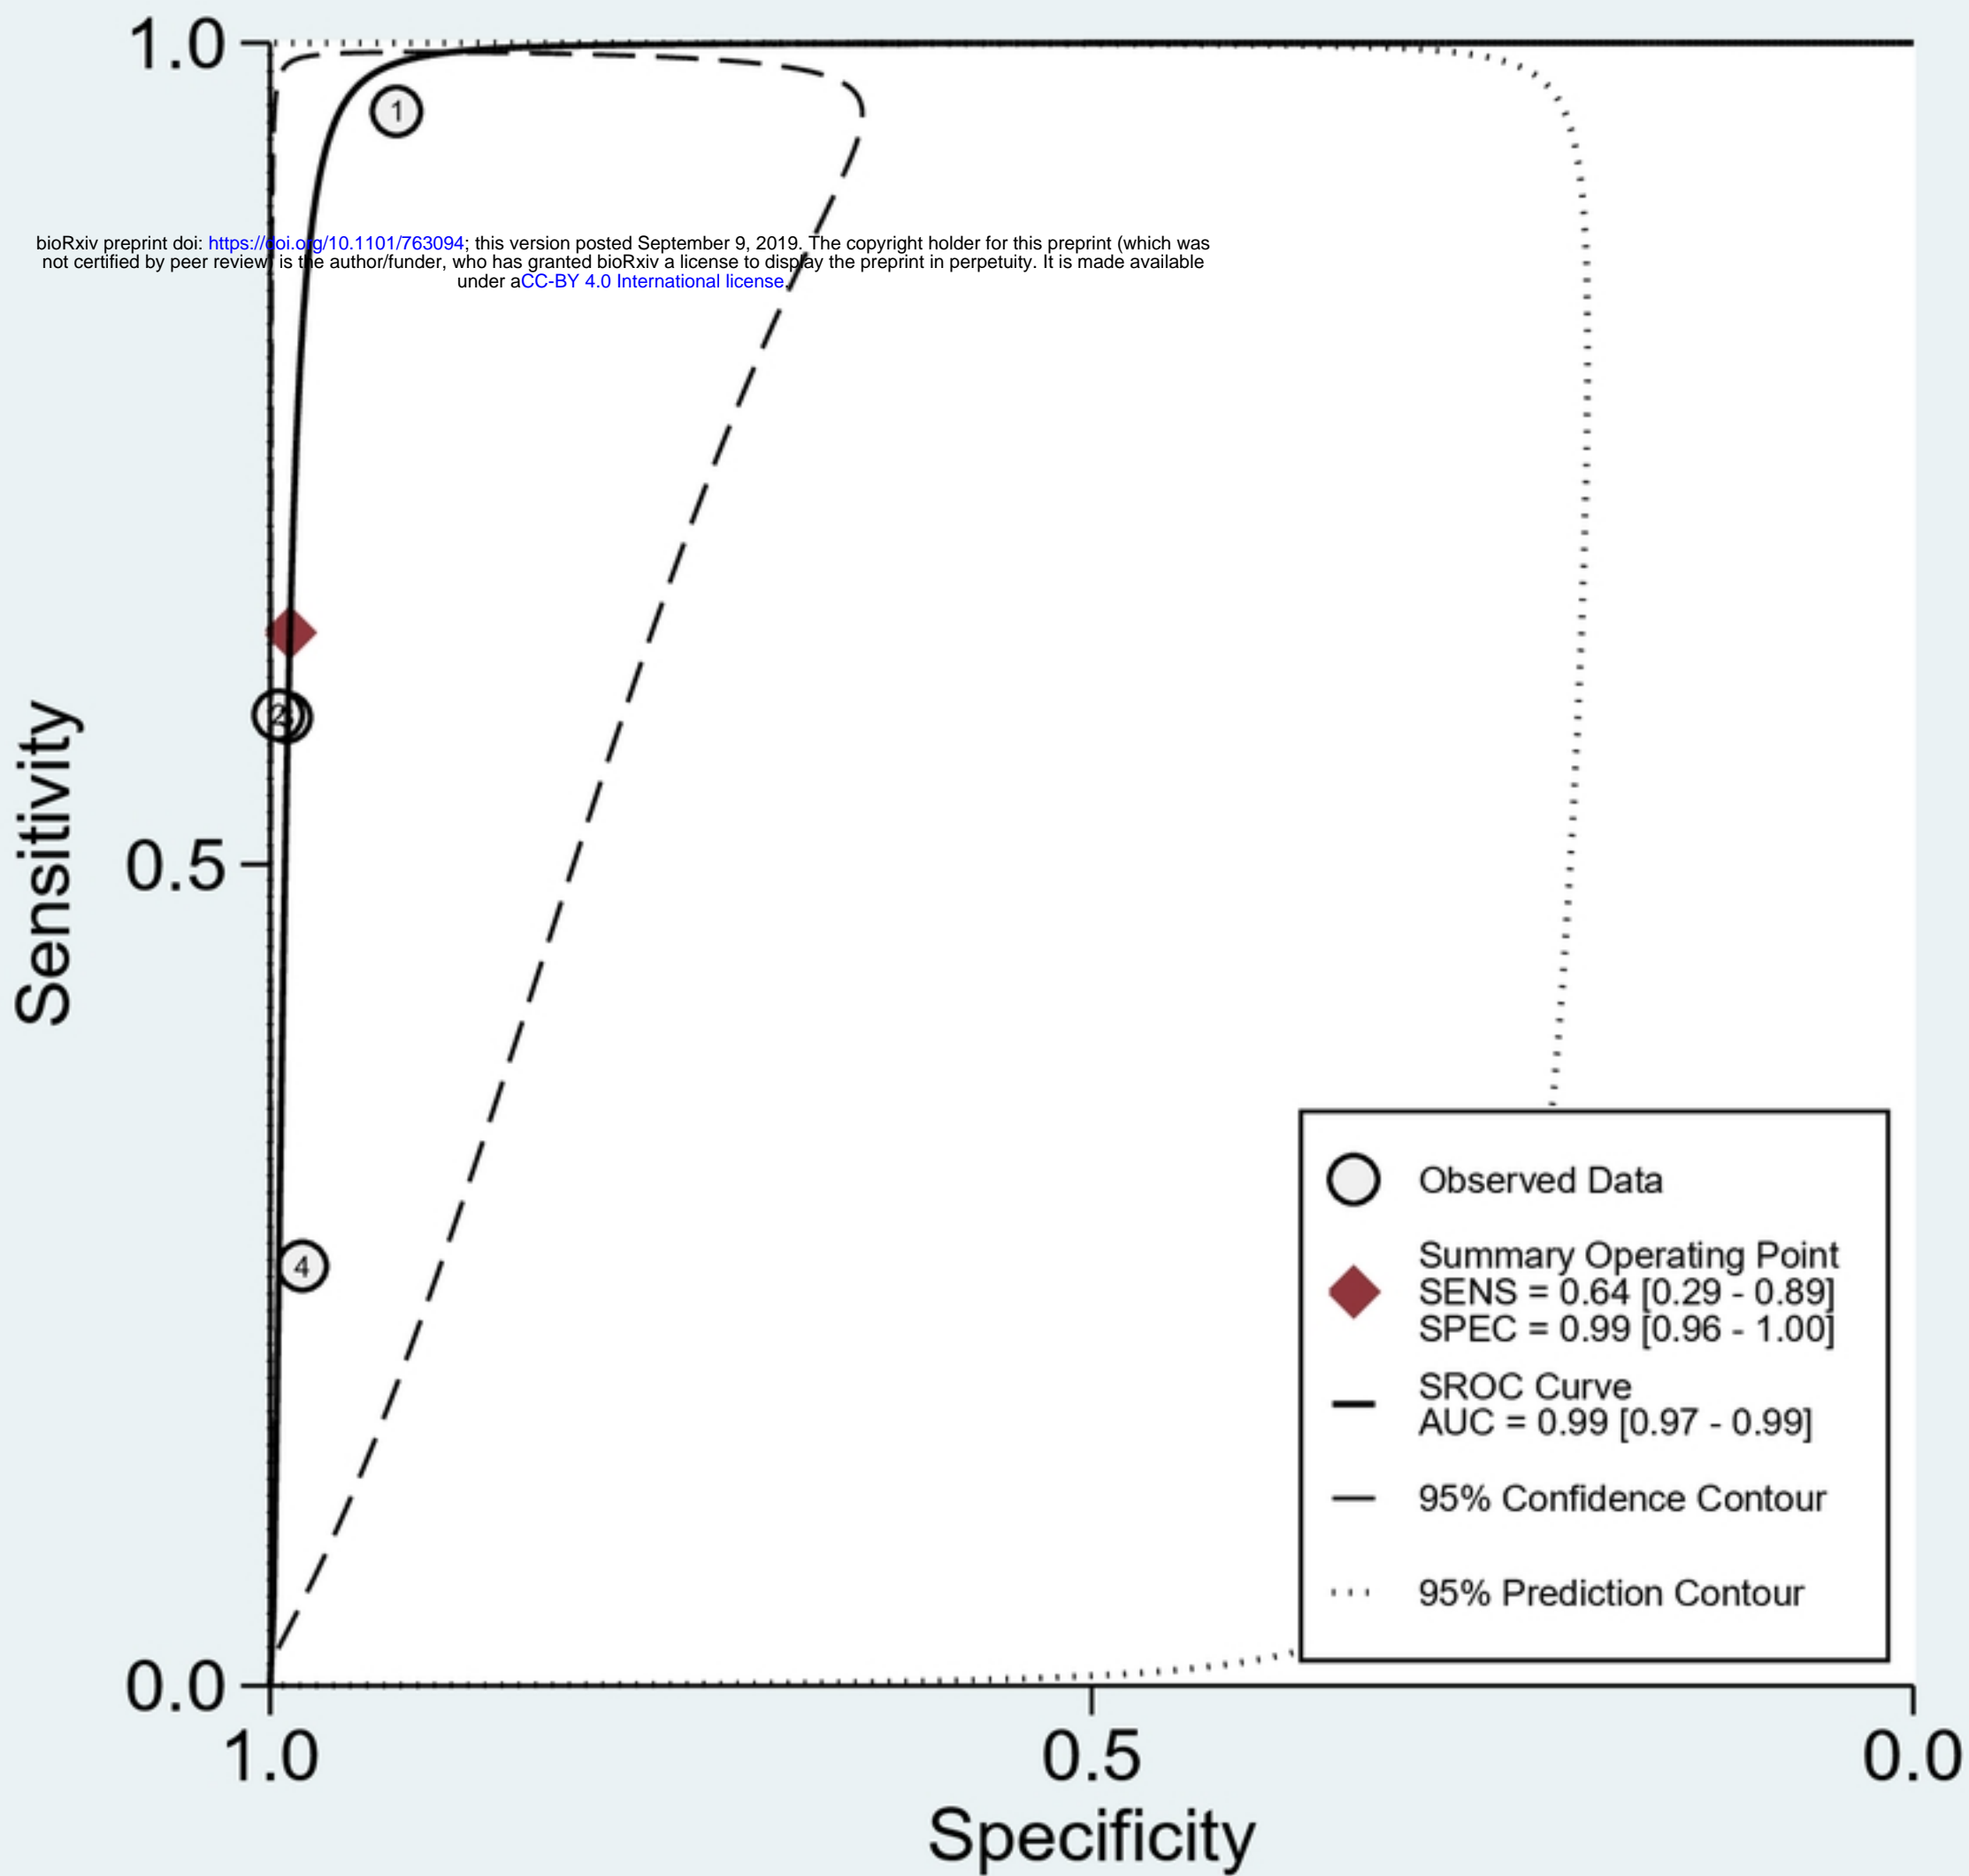

Source: http://biorxiv.org/content/10.1101/763094v1.full.pdf
